# Supplementary material
Source: PubMed Central journal article supplement (PMC4131362)

# Isolation of three microcystins from the cyanobacterium

## *Planktothrix rubescens* strain No80

*Timo H. J. Niedermeyer, Peter Schmieder, Rainer Kurmayer*

|                                                                             |    |
|-----------------------------------------------------------------------------|----|
| Evaluation and annotation of the tandem mass spectra; NMR data of 1-3 ..... | 2  |
| [Asp <sup>3</sup> ,(E)-Dhb <sup>7</sup> ]-MC-LY (1) .....                   | 2  |
| [Asp <sup>3</sup> ,(E)-Dhb <sup>7</sup> ]-MC-HtyW (2) .....                 | 8  |
| [Asp <sup>3</sup> ,(E)-Dhb <sup>7</sup> ]-MC-LW (3) .....                   | 14 |
| Python Script and its output .....                                          | 18 |
| Script .....                                                                | 18 |
| Output.....                                                                 | 19 |
| EC <sub>50</sub> calculation.....                                           | 20 |
| Script .....                                                                | 20 |
| Output.....                                                                 | 24 |
| Typical UV spectra of microcystins.....                                     | 25 |

# Evaluation and annotation of the tandem mass spectra; NMR data of 1 – 3

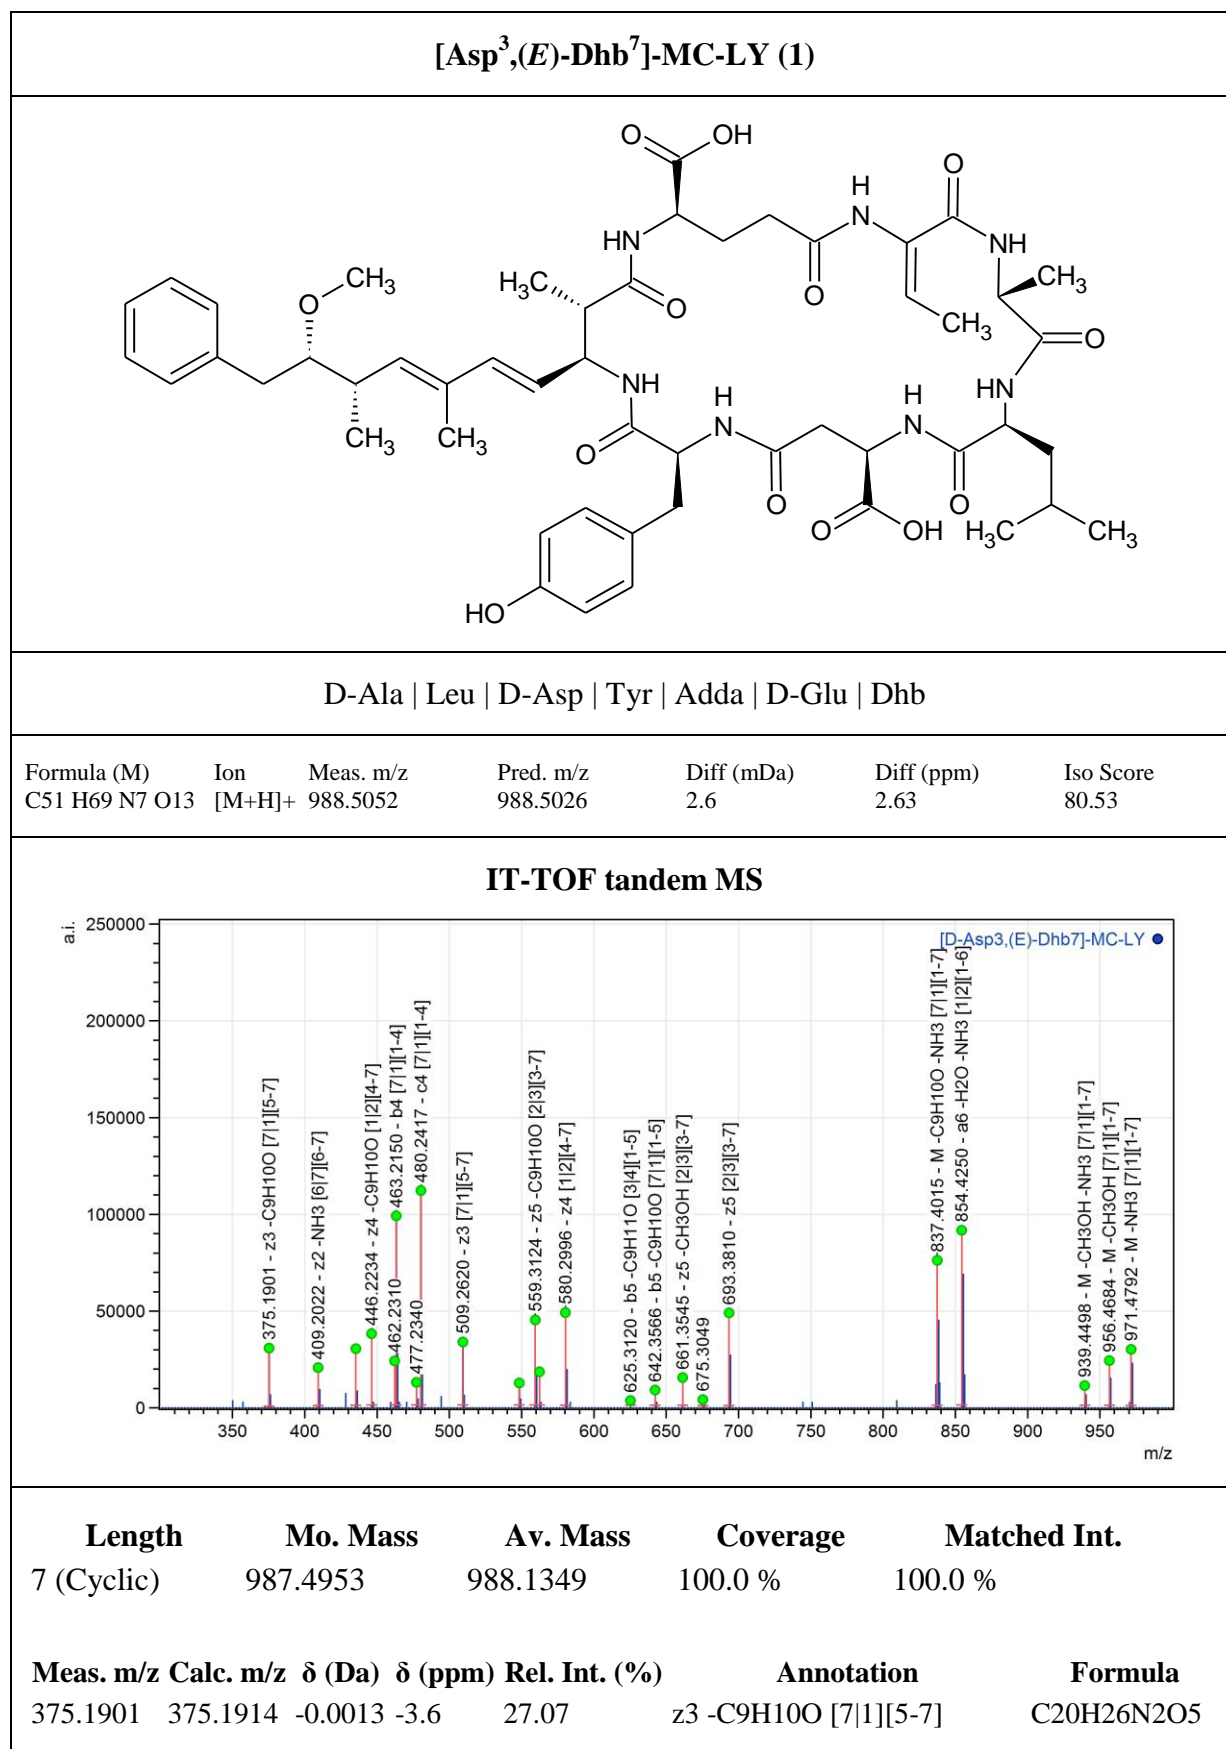

|          |          |         |       |        |                            |             |
|----------|----------|---------|-------|--------|----------------------------|-------------|
| 375.1901 | 375.1914 | -0.0013 | -3.6  | 27.07  | b3 -C9H10O -NH3 [4 5][1-3] | C20H26N2O5  |
| 409.2022 | 409.2010 | 0.0012  | 3.0   | 17.69  | z2 -NH3 [6 7][6-7]         | C25H28O5    |
| 435.2201 | 435.2238 | -0.0038 | -8.6  | 26.35  | a4 [7 1][1-4]              | C21H30N4O6  |
| 446.2234 | 446.2286 | -0.0052 | -11.6 | 33.35  | z4 -C9H10O [1 2][4-7]      | C23H31N3O6  |
| 446.2234 | 446.2286 | -0.0052 | -11.6 | 33.35  | b4 -C9H10O -NH3 [4 5][1-4] | C23H31N3O6  |
| 462.2310 | 462.2347 | -0.0037 | -8.1  | 20.60  | c4 -H2O [7 1][1-4]         | C22H31N5O6  |
| 463.2150 | 463.2187 | -0.0037 | -7.9  | 88.17  | b4 [7 1][1-4]              | C22H30N4O7  |
| 477.2340 | 477.2384 | -0.0044 | -9.2  | 10.62  | z3 -CH3OH [7 1][5-7]       | C28H32N2O5  |
| 477.2340 | 477.2384 | -0.0044 | -9.2  | 10.62  | b3 -CH3OH -NH3 [4 5][1-3]  | C28H32N2O5  |
| 480.2417 | 480.2453 | -0.0036 | -7.5  | 100.00 | c4 [7 1][1-4]              | C22H33N5O7  |
| 509.2620 | 509.2646 | -0.0026 | -5.1  | 29.31  | b3 -NH3 [4 5][1-3]         | C29H36N2O6  |
| 509.2620 | 509.2646 | -0.0026 | -5.1  | 29.31  | z3 [7 1][5-7]              | C29H36N2O6  |
| 548.2773 | 548.2755 | 0.0018  | 3.2   | 10.30  | b4 -CH3OH -NH3 [4 5][1-4]  | C31H37N3O6  |
| 548.2773 | 548.2755 | 0.0018  | 3.2   | 10.30  | z4 -CH3OH [1 2][4-7]       | C31H37N3O6  |
| 559.3124 | 559.3126 | -0.0002 | -0.4  | 39.71  | b5 -C9H10O -NH3 [4 5][1-5] | C29H42N4O7  |
| 559.3124 | 559.3126 | -0.0002 | -0.4  | 39.71  | z5 -C9H10O [2 3][3-7]      | C29H42N4O7  |
| 562.2838 | 562.2912 | -0.0073 | -13.0 | 15.55  | b4 -H2O -NH3 [4 5][1-4]    | C32H39N3O6  |
| 562.2838 | 562.2912 | -0.0073 | -13.0 | 15.55  | z4 -H2O [1 2][4-7]         | C32H39N3O6  |
| 580.2996 | 580.3017 | -0.0021 | -3.6  | 43.14  | z4 [1 2][4-7]              | C32H41N3O7  |
| 580.2996 | 580.3017 | -0.0021 | -3.6  | 43.14  | b4 -NH3 [4 5][1-4]         | C32H41N3O7  |
| 625.3120 | 625.3106 | 0.0014  | 2.2   | 2.12   | b5 -C9H11O [3 4][1-5]      | C32H42N5O8  |
| 642.3566 | 642.3538 | 0.0029  | 4.5   | 7.04   | a4 -H2O -NH3 [1 2][1-4]    | C38H47N3O6  |
| 642.3566 | 642.3497 | 0.0069  | 10.7  | 7.04   | b5 -C9H10O [7 1][1-5]      | C33H47N5O8  |
| 661.3545 | 661.3596 | -0.0051 | -7.7  | 13.00  | z5 -CH3OH [2 3][3-7]       | C37H48N4O7  |
| 661.3545 | 661.3596 | -0.0051 | -7.7  | 13.00  | a4 [3 4][1-4]              | C37H48N4O7  |
| 661.3545 | 661.3596 | -0.0051 | -7.7  | 13.00  | b5 -CH3OH -NH3 [4 5][1-5]  | C37H48N4O7  |
| 675.3049 | 675.2984 | 0.0065  | 9.6   | 2.75   | b6 [5 6][1-6]              | C31H42N6O11 |
| 693.3810 | 693.3858 | -0.0048 | -6.9  | 43.17  | b5 -NH3 [4 5][1-5]         | C38H52N4O8  |
| 693.3810 | 693.3858 | -0.0048 | -6.9  | 43.17  | z5 [2 3][3-7]              | C38H52N4O8  |
| 693.3810 | 693.3732 | 0.0078  | 11.2  | 43.17  | a6 -C9H11O -NH3 [3 4][1-6] | C37H50N5O8  |
| 837.4015 | 837.4029 | -0.0014 | -1.7  | 67.46  | M -C9H10O -NH3 [7 1][1-7]  | C42H56N6O12 |
| 854.4250 | 854.4335 | -0.0084 | -9.9  | 81.46  | a6 -H2O -NH3 [1 2][1-6]    | C47H59N5O10 |
| 854.4250 | 854.4294 | -0.0044 | -5.2  | 81.46  | M -C9H10O [7 1][1-7]       | C42H59N7O12 |
| 939.4498 | 939.4498 | -0.0000 | -0.0  | 9.22   | M -CH3OH -NH3 [7 1][1-7]   | C50H62N6O12 |
| 956.4684 | 956.4764 | -0.0080 | -8.4  | 20.80  | M -CH3OH [7 1][1-7]        | C50H65N7O12 |
| 971.4792 | 971.4761 | 0.0031  | 3.2   | 26.17  | M -NH3 [7 1][1-7]          | C51H66N6O13 |

### Q-TOF tandem MS

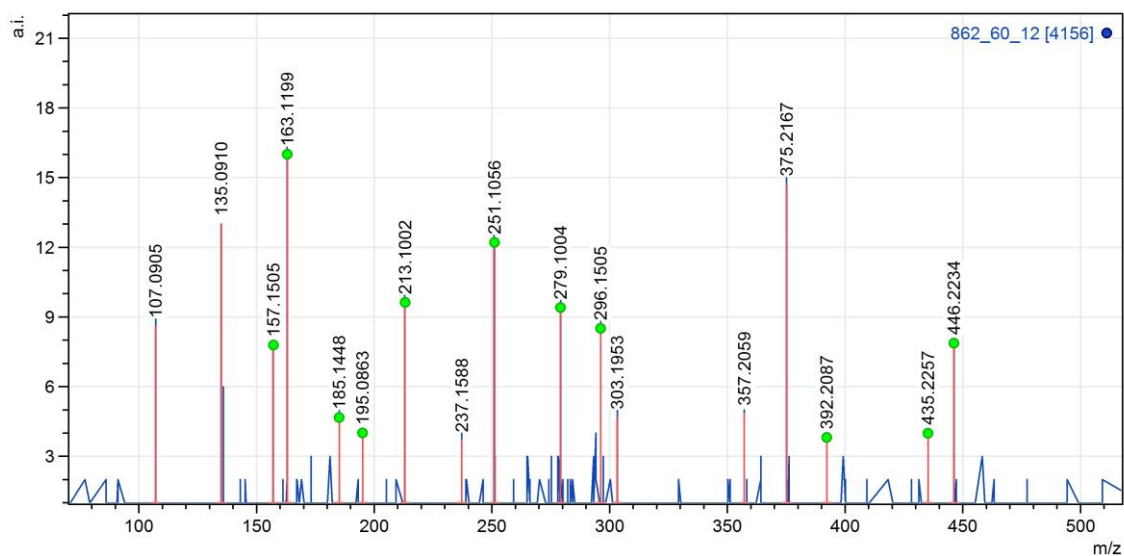

| Meas. m/z | Calc. m/z | $\delta$ (Da) | $\delta$ (ppm) | Rel. Int. (%) | Annotation            | Formula    |
|-----------|-----------|---------------|----------------|---------------|-----------------------|------------|
| 157.1505  | 157.1335  | 0.0169        | 107.9          | 45.22         | a2 [7 1][1-2]         | C8H16N2O   |
| 163.1199  | 163.1117  | 0.0081        | 49.9           | 100.00        | z1 -C9H10O [5 6][7-7] | C11H14O    |
| 185.1448  | 185.1285  | 0.0163        | 88.1           | 24.45         | b2 [7 1][1-2]         | C9H16N2O2  |
| 195.0863  | 195.0764  | 0.0099        | 50.6           | 20.00         | b2 -H2O [5 6][1-2]    | C9H10N2O3  |
| 213.1002  | 213.0870  | 0.0132        | 62.2           | 57.49         | b2 [5 6][1-2]         | C9H12N2O4  |
| 251.1056  | 251.1026  | 0.0029        | 11.6           | 74.72         | a2 [2 3][1-2]         | C12H14N2O4 |
| 279.1004  | 279.0975  | 0.0028        | 10.1           | 56.00         | b2 [2 3][1-2]         | C13H14N2O5 |
| 296.1505  | 296.1605  | -0.0100       | -33.7          | 50.01         | b3 +CO [6 7][1-3]     | C14H21N3O4 |
| 392.2087  | 392.2180  | -0.0093       | -23.6          | 18.75         | b3 -C9H10O [4 5][1-3] | C20H29N3O5 |
| 435.2257  | 435.2238  | 0.0019        | 4.4            | 19.99         | a4 [7 1][1-4]         | C21H30N4O6 |
| 446.2234  | 446.2286  | -0.0051       | -11.5          | 45.83         | z4 -C9H10O [1 2][4-7] | C23H31N3O6 |

# <sup>1</sup>H-NMR spectrum of compound 1

[Asp3,(E)-Dhb7]-MC-LY (1)

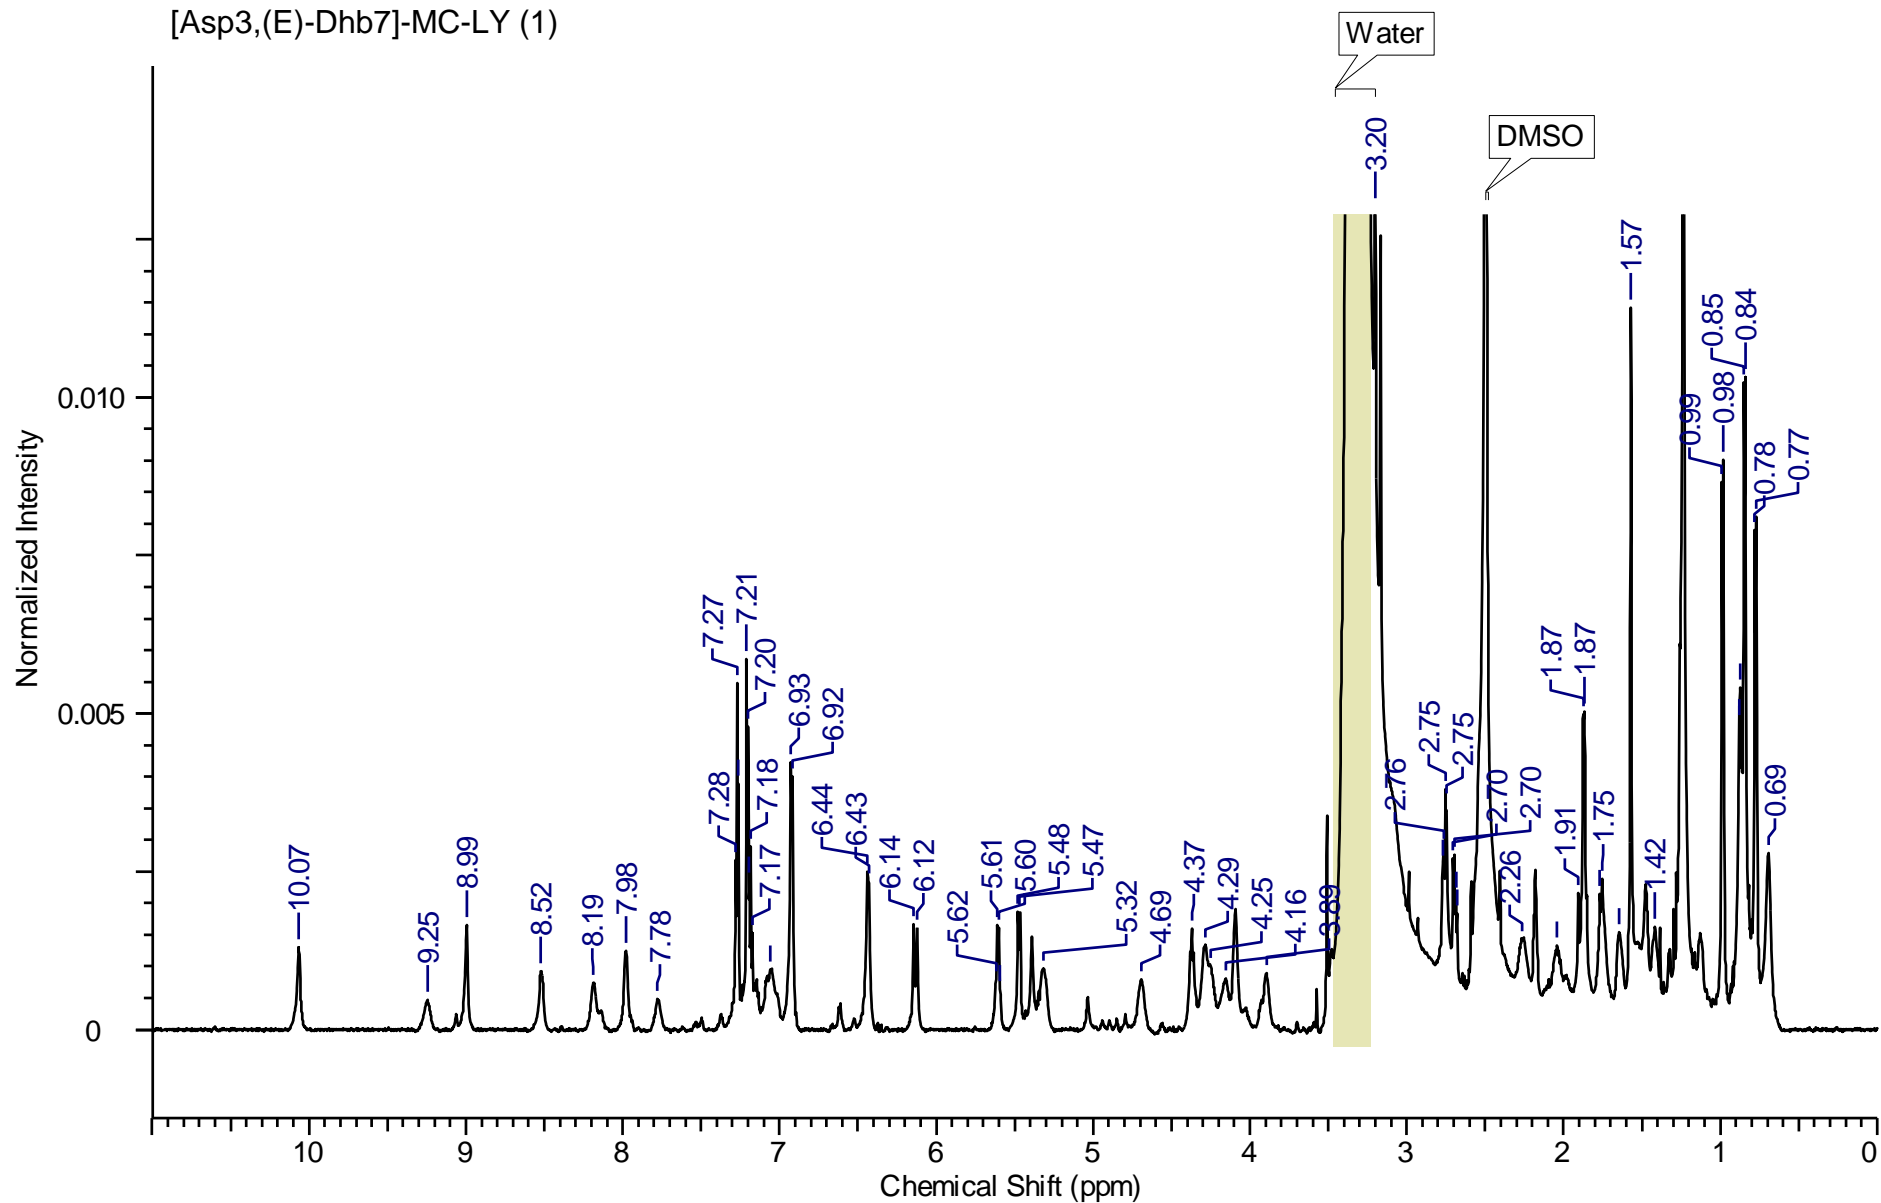

# HMQC spectrum of compound 1

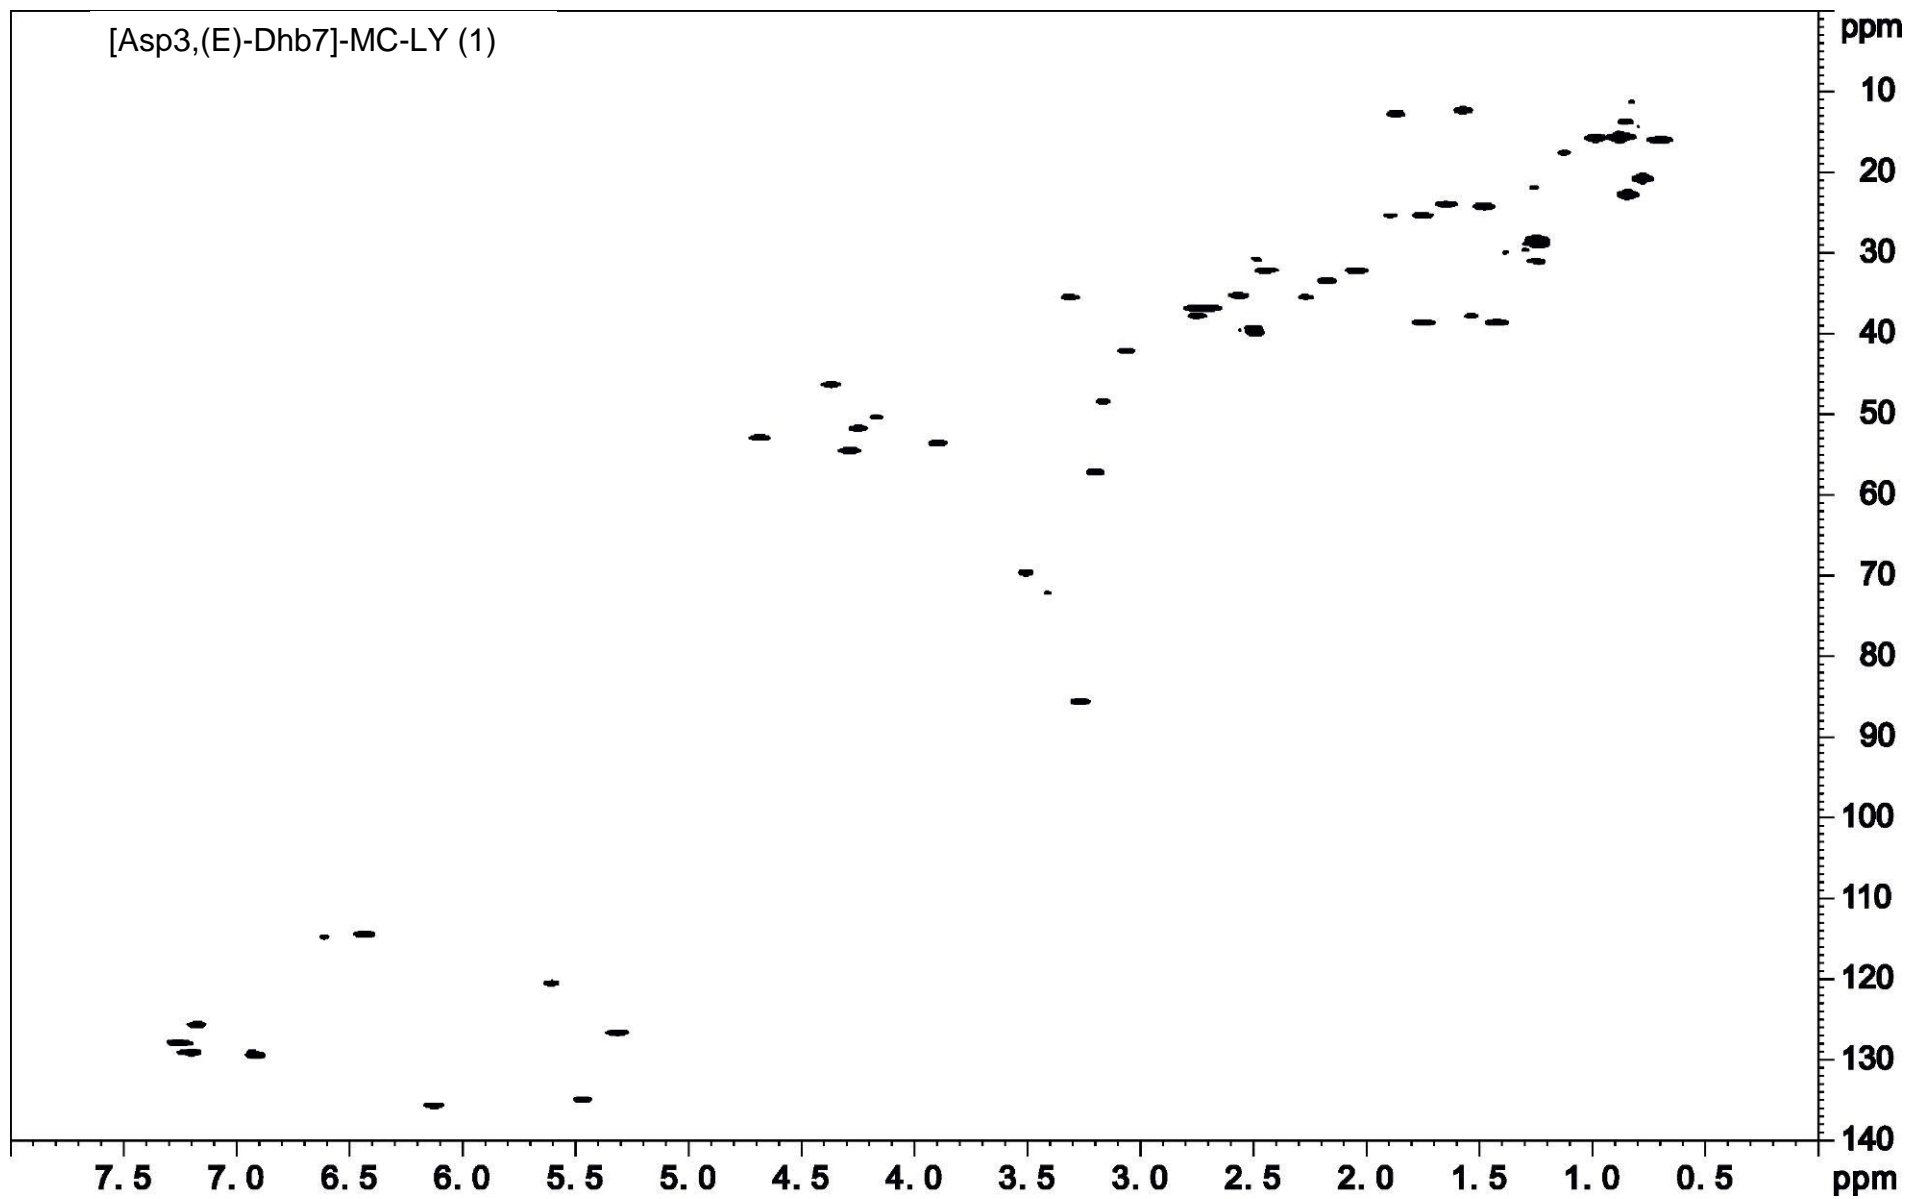

# HMBC spectrum of compound 1

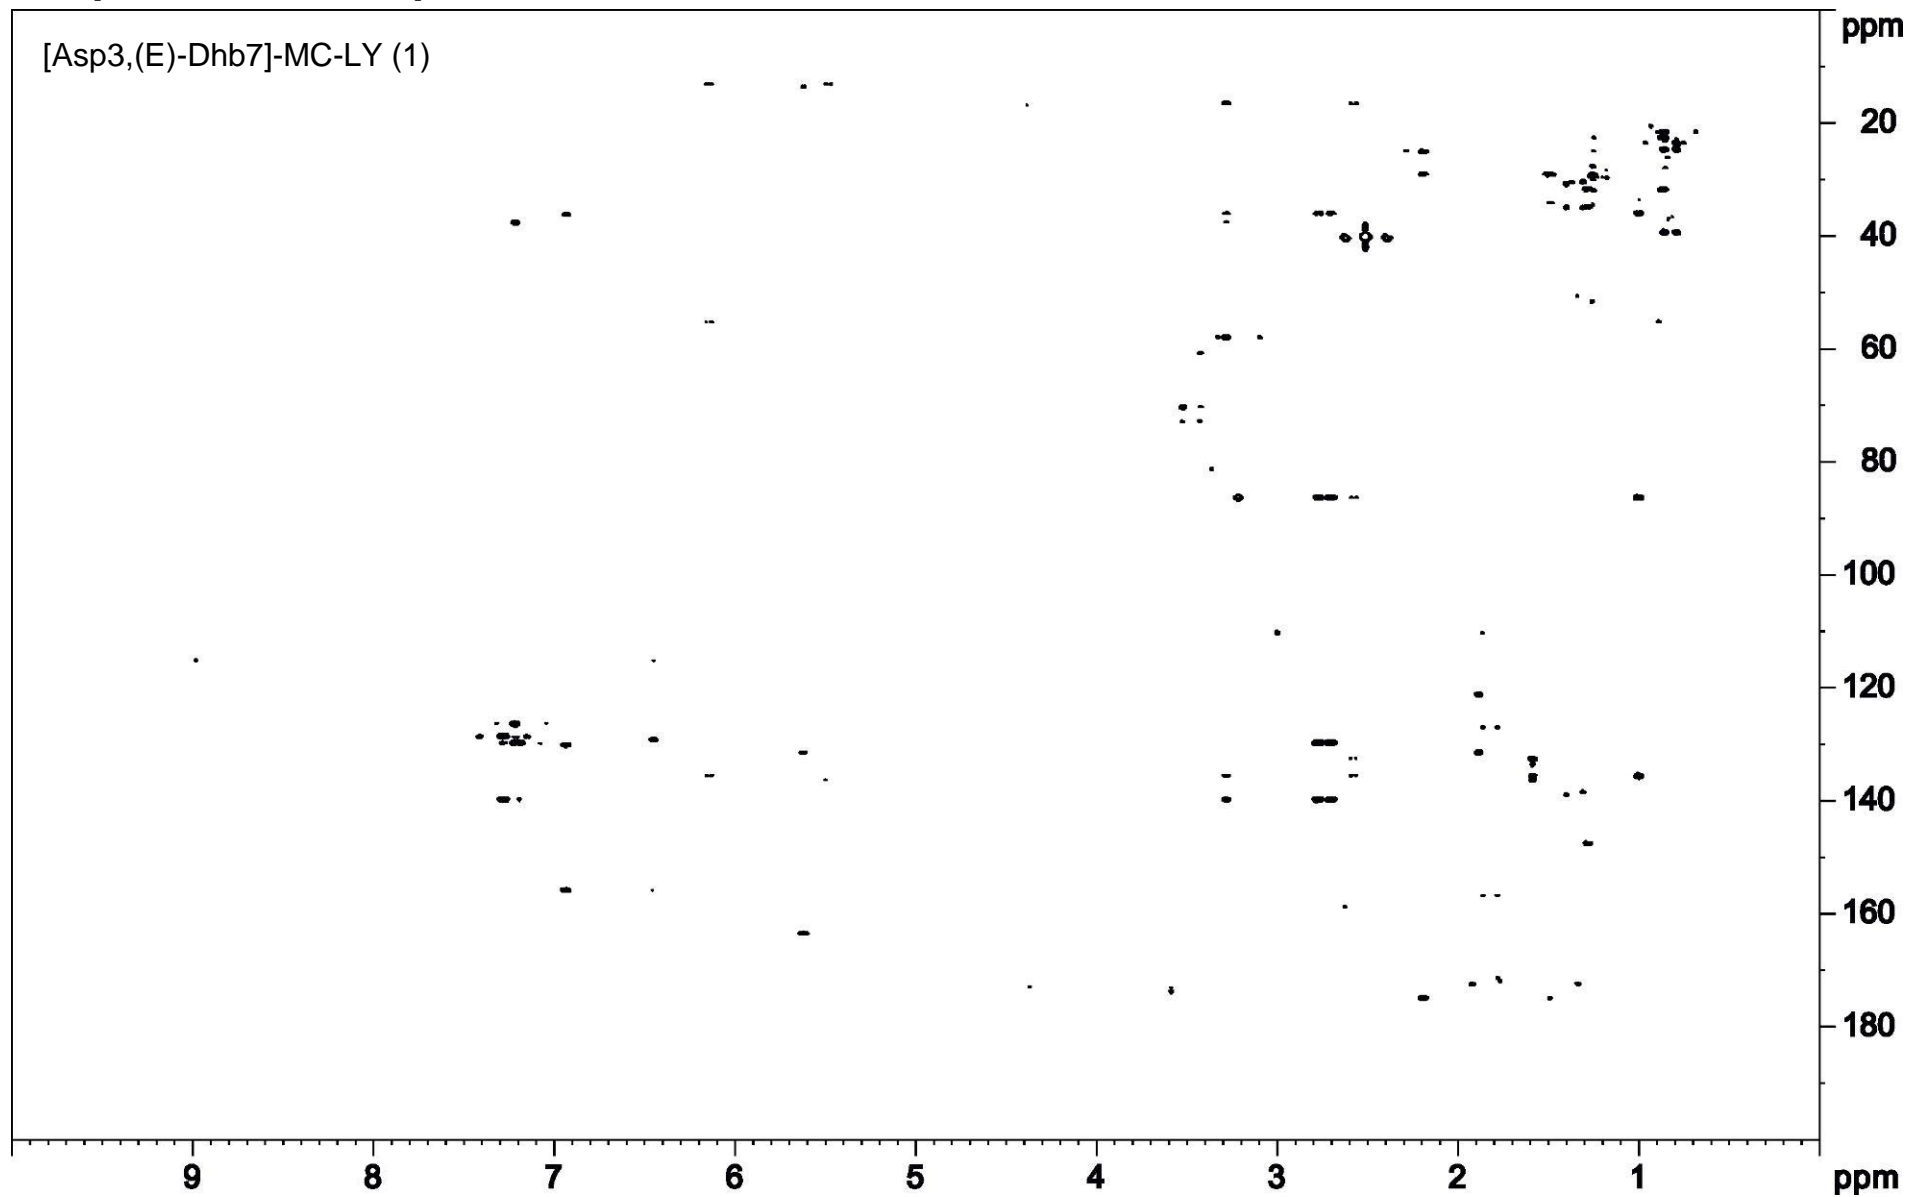

[Asp<sup>3</sup>,(E)-Dhb<sup>7</sup>]-MC-HtyW (2)

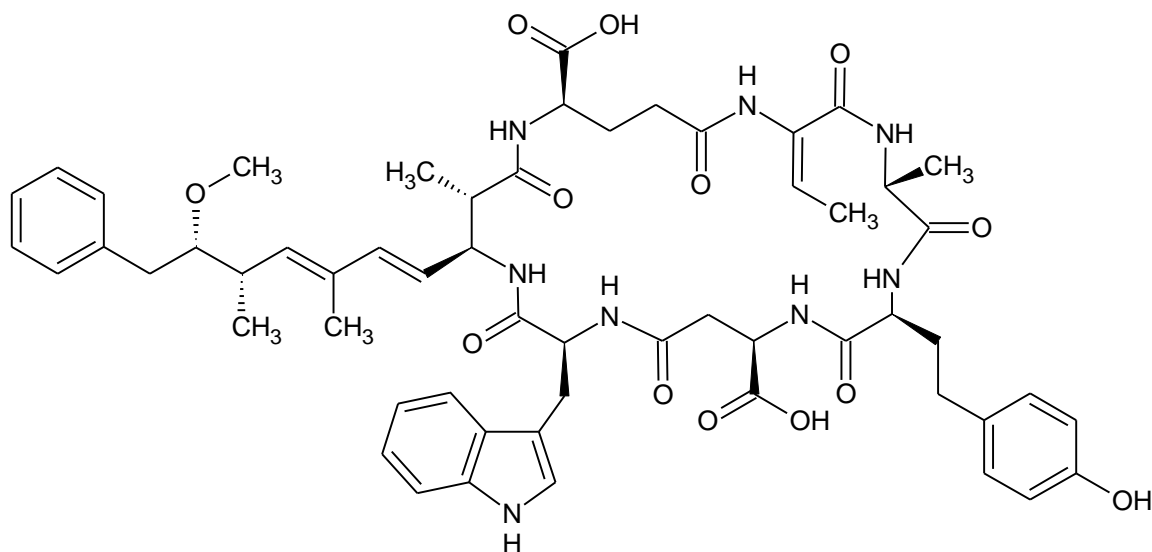

D-Ala | Hty | D-Asp | Trp | Adda | D-Glu | Dhb

| Formula (M)    | Ion                | Meas. m/z | Pred. m/z   | Diff (mDa) | Diff (ppm) | Iso Score |
|----------------|--------------------|-----------|-------------|------------|------------|-----------|
| C57 H70 N8 O13 | [M+H] <sup>+</sup> | 1075.5133 | 1075.5135 - | 0.2 -      | 0.19       | 69.04     |

IT-TOF tandem MS

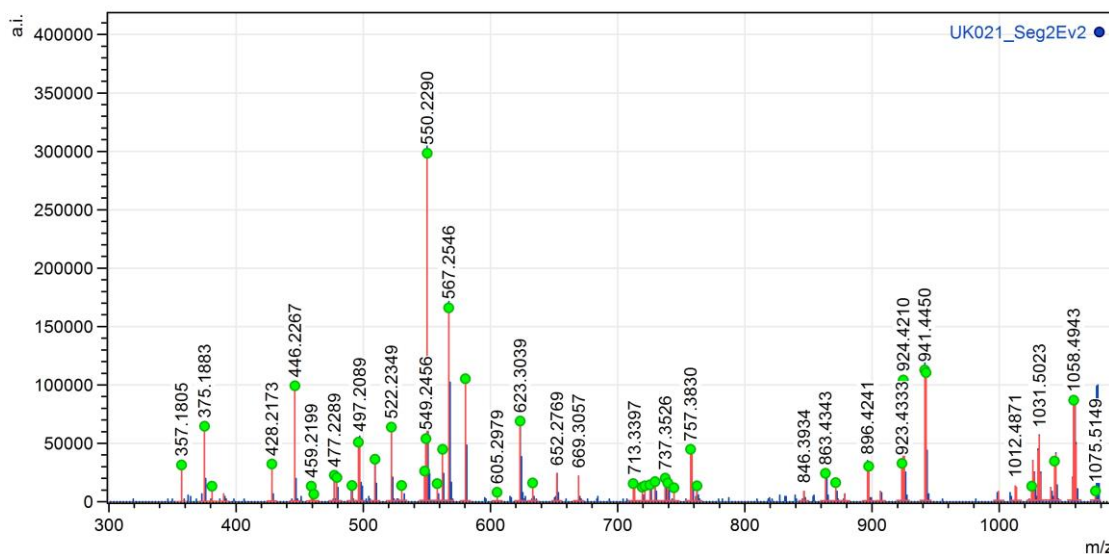

| Length     | Mo. Mass  | Av. Mass  | Coverage | Matched Int. |
|------------|-----------|-----------|----------|--------------|
| 7 (Cyclic) | 1074.5062 | 1075.2140 | 100.0 %  | 77.3 %       |

| Meas. m/z | Calc. m/z | $\delta$ (Da) | $\delta$ (ppm) | Rel. Int. (%) | Annotation                 | Formula    |
|-----------|-----------|---------------|----------------|---------------|----------------------------|------------|
| 357.1805  | 357.1809  | -0.0004       | -1.1           | 10.56         | z3 -C9H10O -H2O [7 1][5-7] | C20H24N2O4 |
| 375.1883  | 375.1914  | -0.0031       | -8.4           | 21.68         | z3 -C9H10O [7 1][5-7]      | C20H26N2O5 |
| 381.1675  | 381.1769  | -0.0094       | -24.6          | 4.41          | c3 [7 1][1-3]              | C17H24N4O6 |
| 428.2173  | 428.2180  | -0.0007       | -1.7           | 10.70         | z4 -C9H10O -H2O [1 2][4-7] | C23H29N3O5 |
| 446.2267  | 446.2286  | -0.0019       | -4.2           | 33.20         | z4 -C9H10O [1 2][4-7]      | C23H31N3O6 |
| 459.2199  | 459.2278  | -0.0080       | -17.3          | 4.29          | z3 -CH3OH -H2O [7 1][5-7]  | C28H30N2O4 |



|           |           |         |       |        |                            |             |
|-----------|-----------|---------|-------|--------|----------------------------|-------------|
| 459.2199  | 459.2153  | 0.0046  | 10.1  | 4.29   | z3 -C9H11O -H2O [6 7][5-7] | C27H28N3O4  |
| 461.1987  | 461.2031  | -0.0043 | -9.4  | 1.98   | b4 [5 6][1-4]              | C22H28N4O7  |
| 477.2289  | 477.2384  | -0.0095 | -19.8 | 7.36   | b3 -CH3OH -NH3 [4 5][1-3]  | C28H32N2O5  |
| 477.2289  | 477.2258  | 0.0031  | 6.5   | 7.36   | z3 -C9H11O [6 7][5-7]      | C27H30N3O5  |
| 479.1925  | 479.1925  | 0.0000  | 0.1   | 6.73   | b3 [1 2][1-3]              | C25H26N4O6  |
| 491.2515  | 491.2540  | -0.0025 | -5.1  | 4.35   | b3 -H2O -NH3 [4 5][1-3]    | C29H34N2O5  |
| 496.2198  | 496.2191  | 0.0007  | 1.4   | 16.87  | c3 [1 2][1-3]              | C25H29N5O6  |
| 509.2641  | 509.2646  | -0.0005 | -1.0  | 11.92  | b3 -NH3 [4 5][1-3]         | C29H36N2O6  |
| 522.2349  | 522.2347  | 0.0002  | 0.3   | 21.13  | a4 [7 1][1-4]              | C27H31N5O6  |
| 530.2561  | 530.2649  | -0.0089 | -16.8 | 4.36   | z4 -CH3OH -H2O [1 2][4-7]  | C31H35N3O5  |
| 548.2772  | 548.2755  | 0.0017  | 3.1   | 8.45   | b4 -CH3OH -NH3 [4 5][1-4]  | C31H37N3O6  |
| 549.2456  | 549.2384  | 0.0072  | 13.1  | 17.85  | z3 -CH3OH -NH3 [5 6][5-7]  | C34H32N2O5  |
| 550.2290  | 550.2296  | -0.0007 | -1.2  | 100.00 | b4 [7 1][1-4]              | C28H31N5O7  |
| 558.2212  | 558.2195  | 0.0017  | 3.1   | 4.88   | b5 -H2O [5 6][1-5]         | C26H31N5O9  |
| 562.2896  | 562.2912  | -0.0016 | -2.8  | 14.80  | b4 -H2O -NH3 [4 5][1-4]    | C32H39N3O6  |
| 567.2546  | 567.2562  | -0.0016 | -2.8  | 55.54  | c4 [7 1][1-4]              | C28H34N6O7  |
| 580.2989  | 580.3017  | -0.0029 | -4.9  | 35.08  | b4 -NH3 [4 5][1-4]         | C32H41N3O7  |
| 605.2979  | 605.2970  | 0.0009  | 1.6   | 2.46   | z5 -C9H10O -H2O [2 3][3-7] | C33H40N4O7  |
| 623.3039  | 623.3075  | -0.0036 | -5.8  | 22.97  | z5 -C9H10O [2 3][3-7]      | C33H42N4O8  |
| 633.2742  | 633.2667  | 0.0074  | 11.8  | 5.12   | b5 [6 7][1-5]              | C32H36N6O8  |
| 712.3425  | 712.3341  | 0.0085  | 11.9  | 4.93   | b4 -CH3OH [2 3][1-4]       | C39H45N5O8  |
| 712.3425  | 712.3341  | 0.0085  | 11.9  | 4.93   | z5 -C9H10O [5 6][3-7]      | C39H45N5O8  |
| 719.3325  | 719.3399  | -0.0074 | -10.3 | 3.93   | a6 -C9H10O -NH3 [2 3][1-6] | C37H46N6O9  |
| 721.3600  | 721.3596  | 0.0005  | 0.7   | 4.31   | z5 -H2O -H2O [2 3][3-7]    | C42H48N4O7  |
| 725.3582  | 725.3545  | 0.0037  | 5.2   | 4.60   | z5 -CH3OH [2 3][3-7]       | C41H48N4O8  |
| 729.3588  | 729.3647  | -0.0058 | -8.0  | 5.50   | a4 -H2O -NH3 [1 2][1-4]    | C44H48N4O6  |
| 729.3588  | 729.3606  | -0.0018 | -2.5  | 5.50   | b5 -C9H10O [7 1][1-5]      | C39H48N6O8  |
| 737.3526  | 737.3505  | 0.0021  | 2.9   | 6.56   | b6 -C9H10O -H2O [4 5][1-6] | C37H48N6O10 |
| 739.3658  | 739.3701  | -0.0044 | -5.9  | 5.19   | b5 -H2O -NH3 [4 5][1-5]    | C42H50N4O8  |
| 744.3032  | 744.2988  | 0.0044  | 5.9   | 3.79   | b6 -H2O [5 6][1-6]         | C37H41N7O10 |
| 757.3830  | 757.3807  | 0.0023  | 3.1   | 14.84  | b5 -NH3 [4 5][1-5]         | C42H52N4O9  |
| 762.3153  | 762.3093  | 0.0059  | 7.8   | 4.32   | b6 [5 6][1-6]              | C37H43N7O11 |
| 863.4343  | 863.4338  | 0.0005  | 0.6   | 7.89   | b5 [7 1][1-5]              | C48H58N6O9  |
| 871.4274  | 871.4236  | 0.0038  | 4.4   | 5.26   | b6 -H2O [4 5][1-6]         | C46H58N6O11 |
| 897.4226  | 897.4182  | 0.0045  | 5.0   | 9.88   | b6 -CH3OH -NH3 [6 7][1-6]  | C51H56N6O9  |
| 923.4333  | 923.4298  | 0.0035  | 3.8   | 10.67  | M -C9H10O -H2O [7 1][1-7]  | C48H58N8O11 |
| 924.4210  | 924.4138  | 0.0073  | 7.8   | 34.76  | M -C9H10O -NH3 [7 1][1-7]  | C48H57N7O12 |
| 925.4215  | 925.4131  | 0.0085  | 9.1   | 31.95  | z6 -CH3OH -H2O [6 7][2-7]  | C52H56N6O10 |
| 941.4450  | 941.4403  | 0.0046  | 4.9   | 37.54  | M -C9H10O [7 1][1-7]       | C48H60N8O12 |
| 942.4466  | 942.4396  | 0.0069  | 7.4   | 36.78  | b6 +CO -CH3OH [6 7][1-6]   | C52H59N7O10 |
| 942.4466  | 942.4396  | 0.0069  | 7.4   | 36.78  | b6 -CH3OH -H2O [7 1][1-6]  | C52H59N7O10 |
| 1025.4828 | 1025.4767 | 0.0061  | 5.9   | 4.03   | M -CH3OH -H2O [7 1][1-7]   | C56H64N8O11 |
| 1043.4912 | 1043.4873 | 0.0039  | 3.7   | 11.25  | M -CH3OH [7 1][1-7]        | C56H66N8O12 |
| 1058.4943 | 1058.4870 | 0.0074  | 7.0   | 28.80  | M -NH3 [7 1][1-7]          | C57H67N7O13 |

### Q-TOF tandem MS

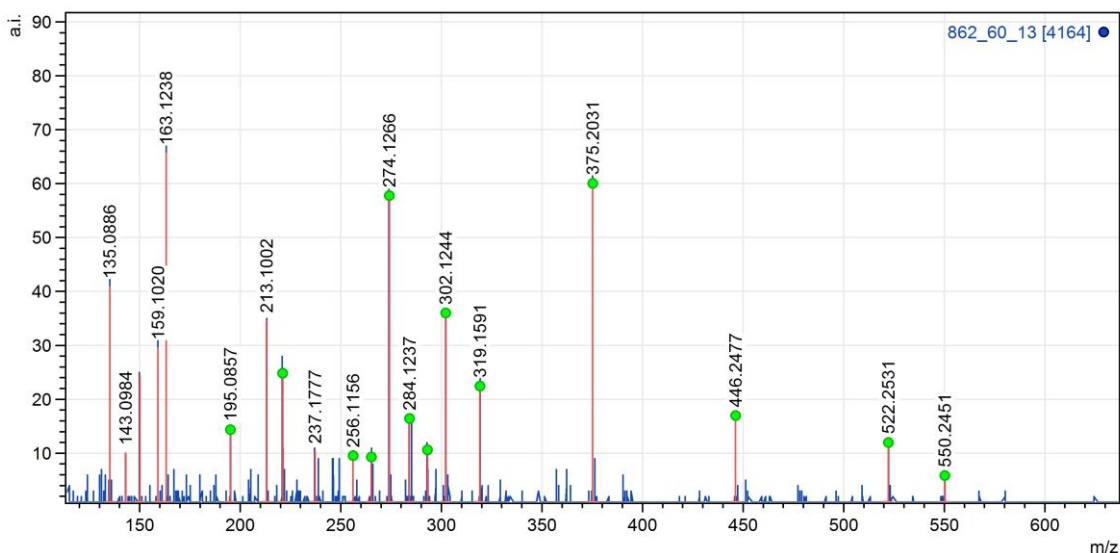

| Meas. m/z | Calc. m/z | $\delta$ (Da) | $\delta$ (ppm) | Rel.Int. (%) | Annotation                   | Formula    |
|-----------|-----------|---------------|----------------|--------------|------------------------------|------------|
| 195.0857  | 195.0764  | 0.0093        | 47.7           | 20.68        | b2 -H2O [5 6][1-2]           | C9H10N2O3  |
| 221.1297  | 221.1285  | 0.0012        | 5.5            | 36.87        | a2 [7 1][1-2]                | C12H16N2O2 |
| 256.1156  | 256.1081  | 0.0075        | 29.4           | 13.21        | a2 -H2O [2 3][1-2]           | C14H13N3O2 |
| 265.1675  | 265.1587  | 0.0088        | 33.3           | 12.90        | z1 -CH3OH [5 6][7-7]         | C19H20O    |
| 274.1266  | 274.1186  | 0.0080        | 29.3           | 87.86        | a2 [2 3][1-2]                | C14H15N3O3 |
| 284.1237  | 284.1241  | -0.0004       | -1.3           | 23.88        | b3 [5 6][1-3]                | C12H17N3O5 |
| 293.1310  | 293.1244  | 0.0066        | 22.5           | 14.93        | c3 +CO -H2O -H2O [5 6][1-3]  | C13H16N4O4 |
| 302.1244  | 302.1135  | 0.0109        | 35.9           | 54.17        | b2 [2 3][1-2]                | C15H15N3O4 |
| 319.1591  | 319.1652  | -0.0062       | -19.3          | 33.22        | b2+CO-C9H10O -H2O [4 5][1-2] | C17H22N2O4 |
| 375.2031  | 375.1914  | 0.0116        | 31.0           | 91.43        | z3 -C9H10O [7 1][5-7]        | C20H26N2O5 |
| 446.2477  | 446.2286  | 0.0192        | 42.9           | 24.77        | b4 -C9H10O -NH3 [4 5][1-4]   | C23H31N3O6 |
| 522.2531  | 522.2347  | 0.0184        | 35.2           | 17.03        | a4 [7 1][1-4]                | C27H31N5O6 |
| 550.2451  | 550.2296  | 0.0154        | 28.1           | 7.50         | b4 [7 1][1-4]                | C28H31N5O7 |

# <sup>1</sup>H-NMR spectrum of compound 2

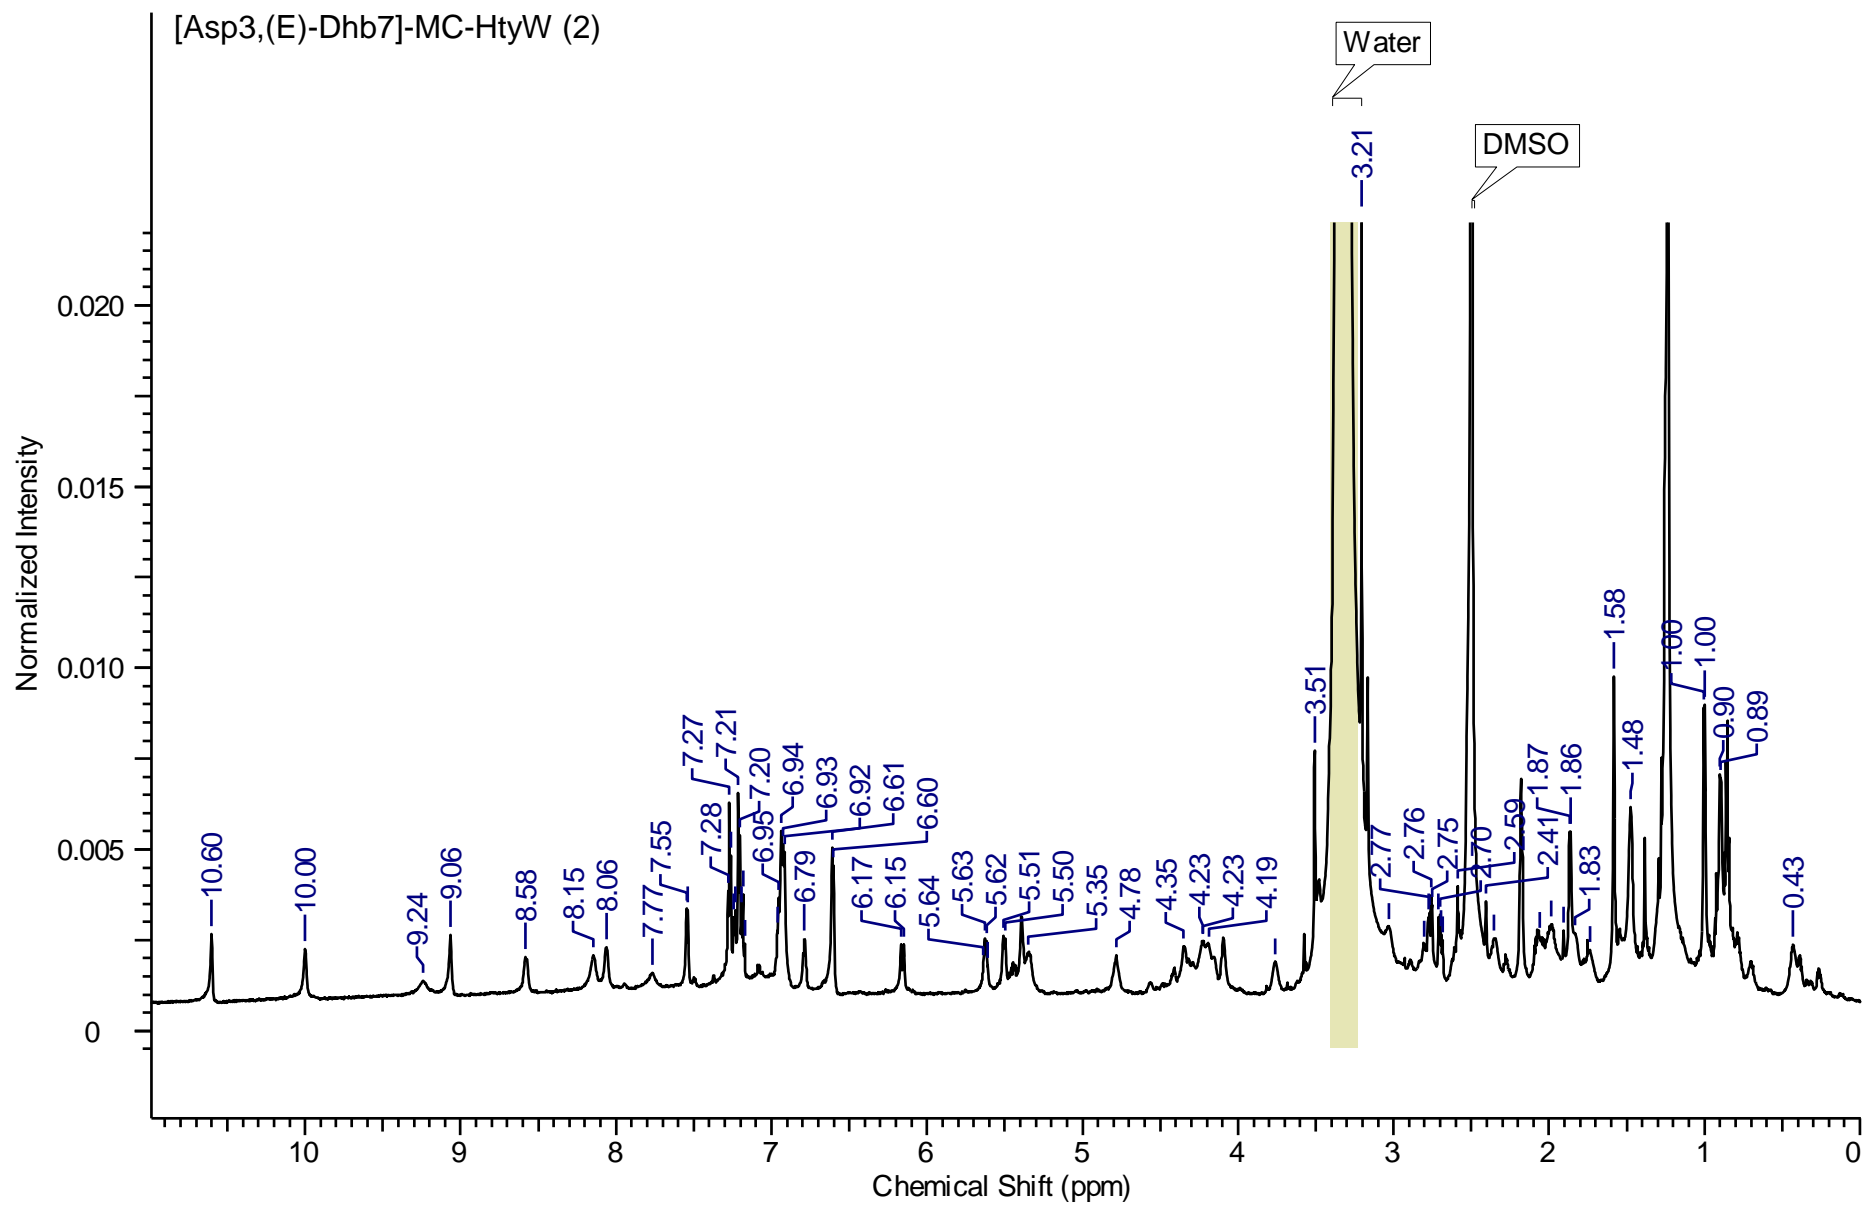

## HMQC spectrum of compound 2

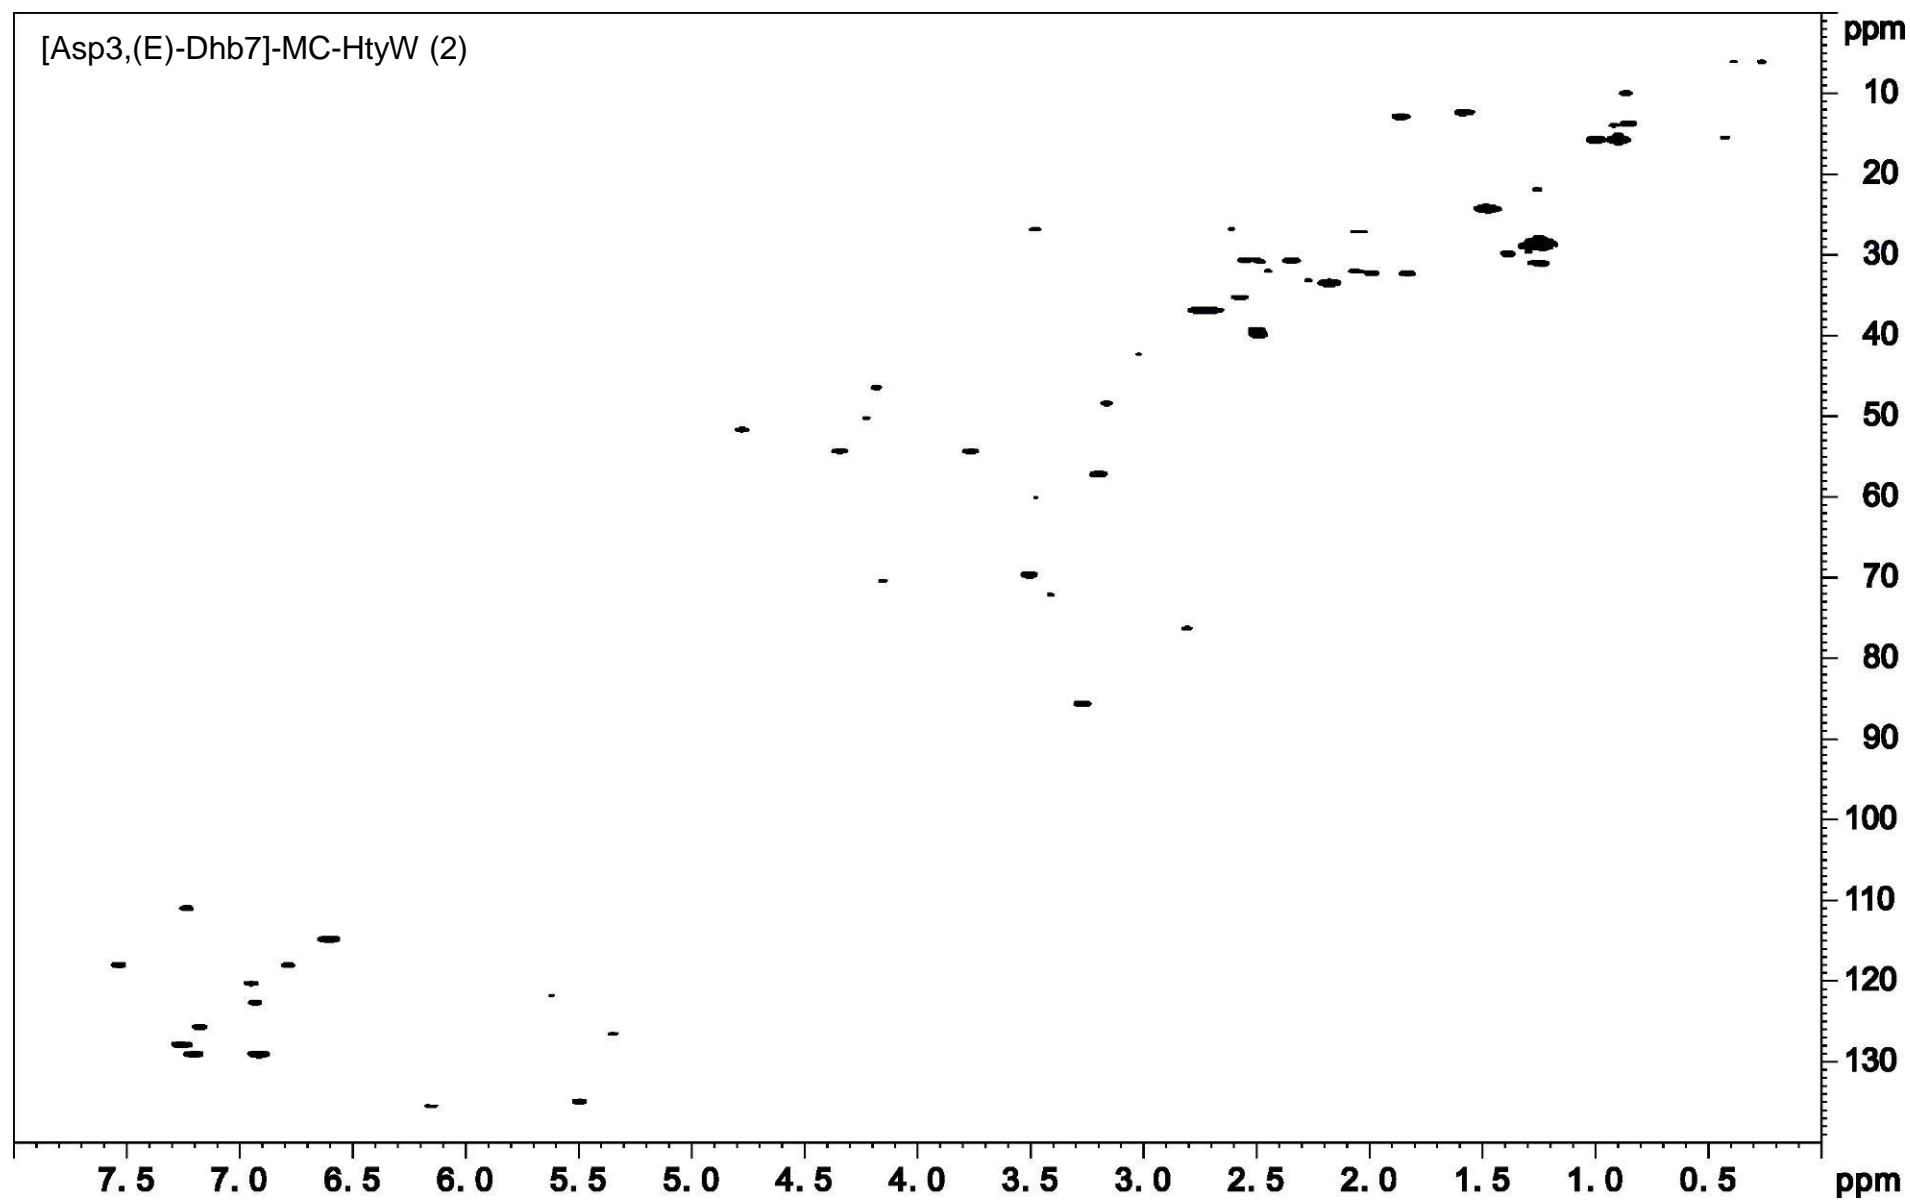

## HMBC spectrum of compound 2

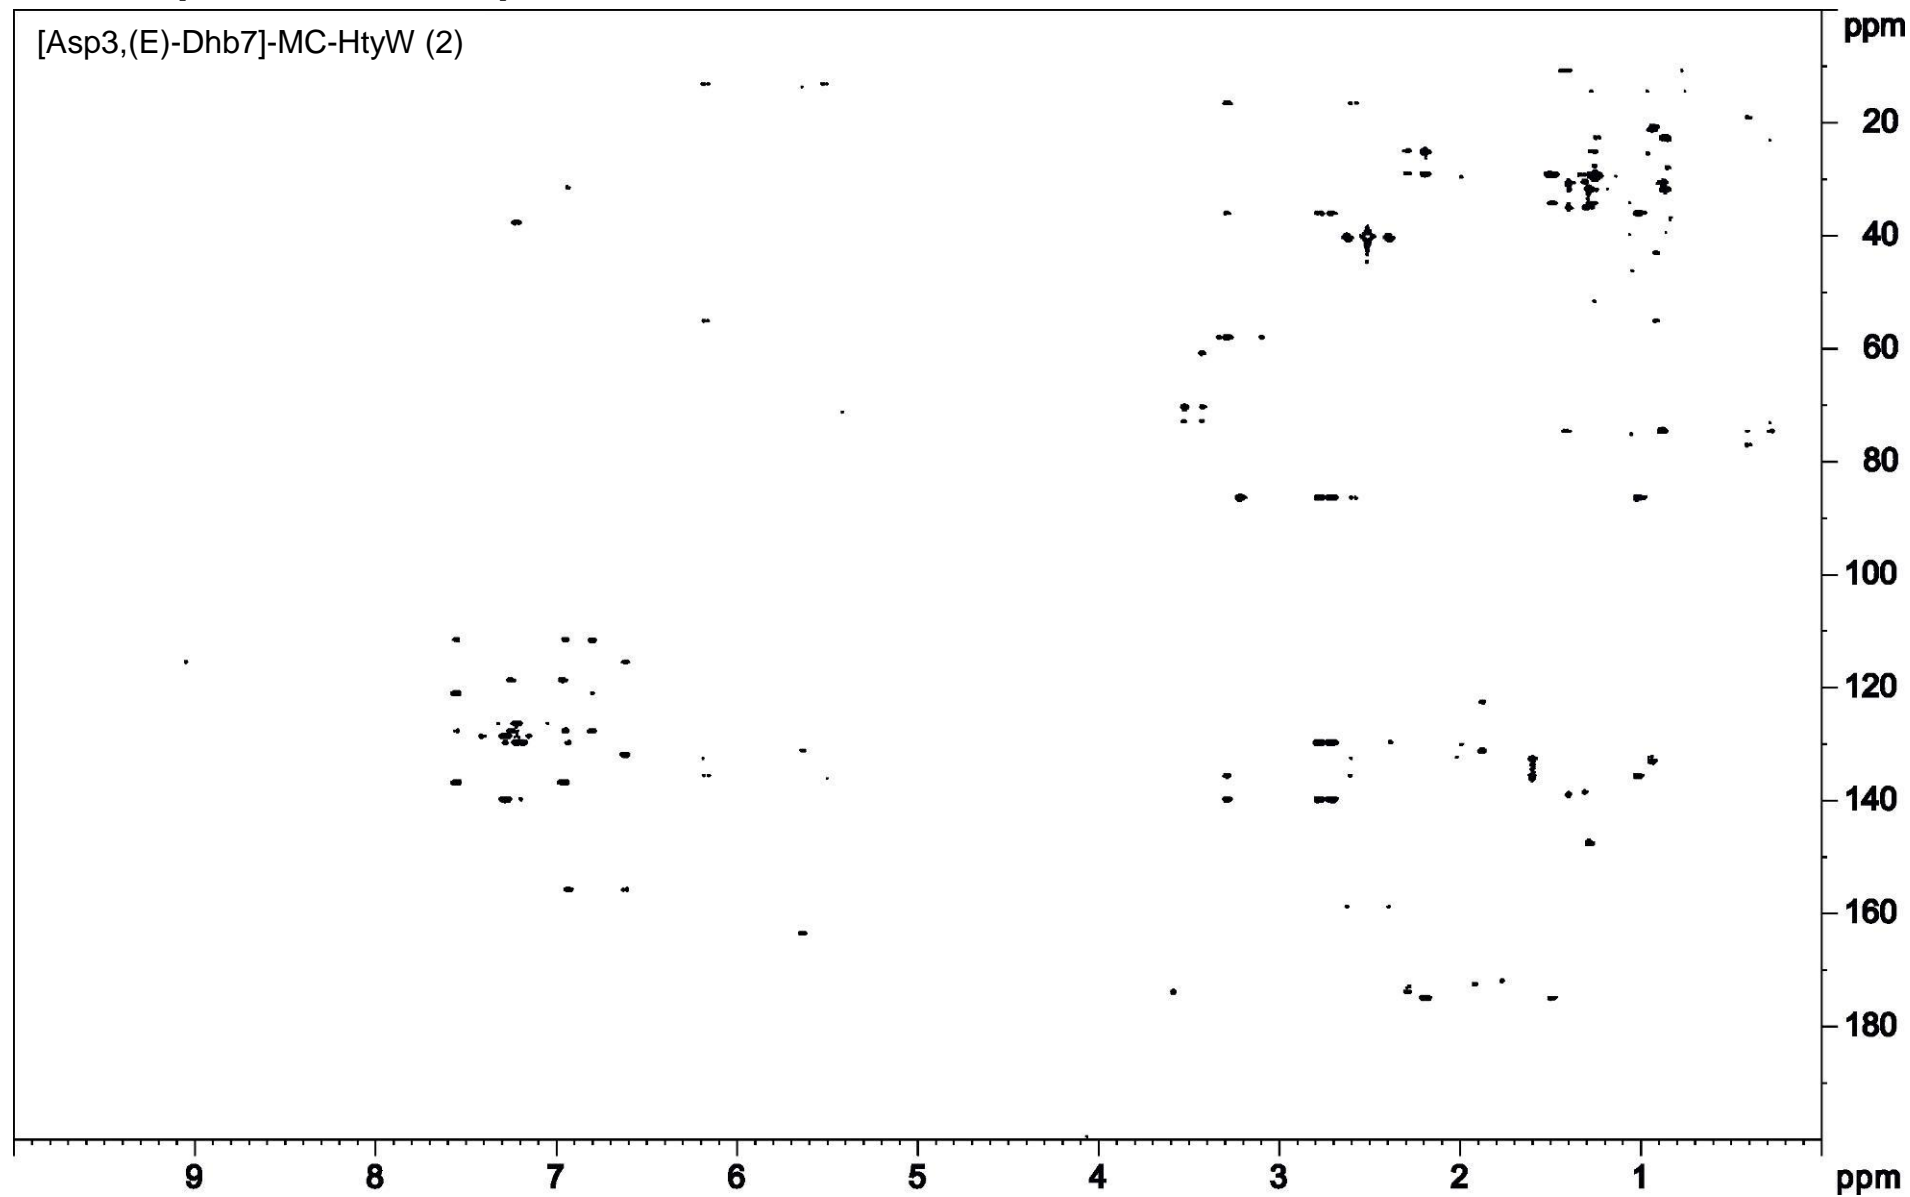

[Asp<sup>3</sup>,(E)-Dhb<sup>7</sup>]-MC-LW (3)

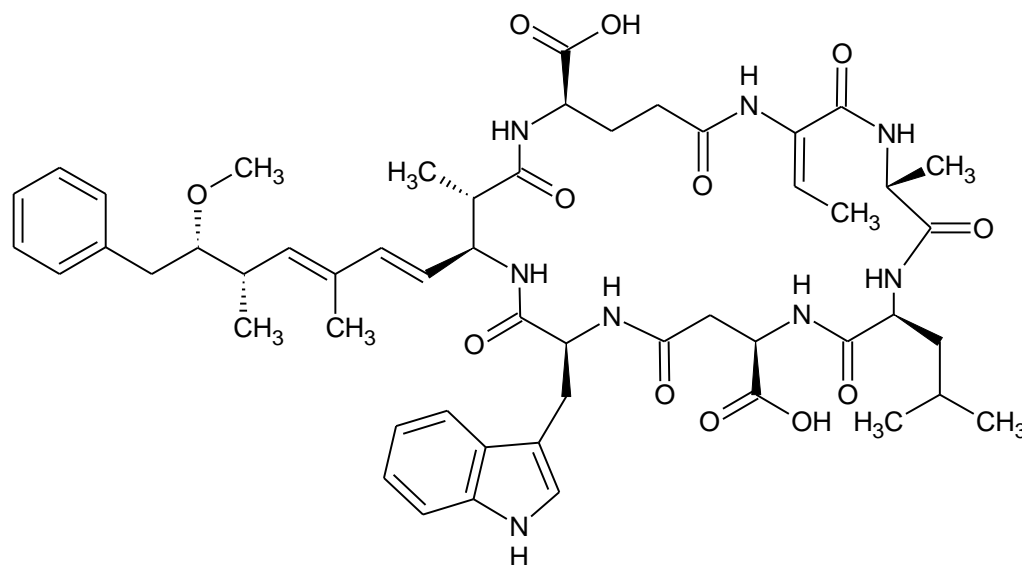

D-Ala | Leu | D-Asp | Trp | Adda | D-Glu | Dhb

| Formula (M)    | Ion                | Meas. m/z | Pred. m/z | Diff (mDa) | Diff (ppm) | Iso Score |
|----------------|--------------------|-----------|-----------|------------|------------|-----------|
| C53 H70 N8 O12 | [M+H] <sup>+</sup> | 1011.5172 | 1011.5186 | -1.4       | -1.38      | 79.91     |

IT-TOF tandem MS

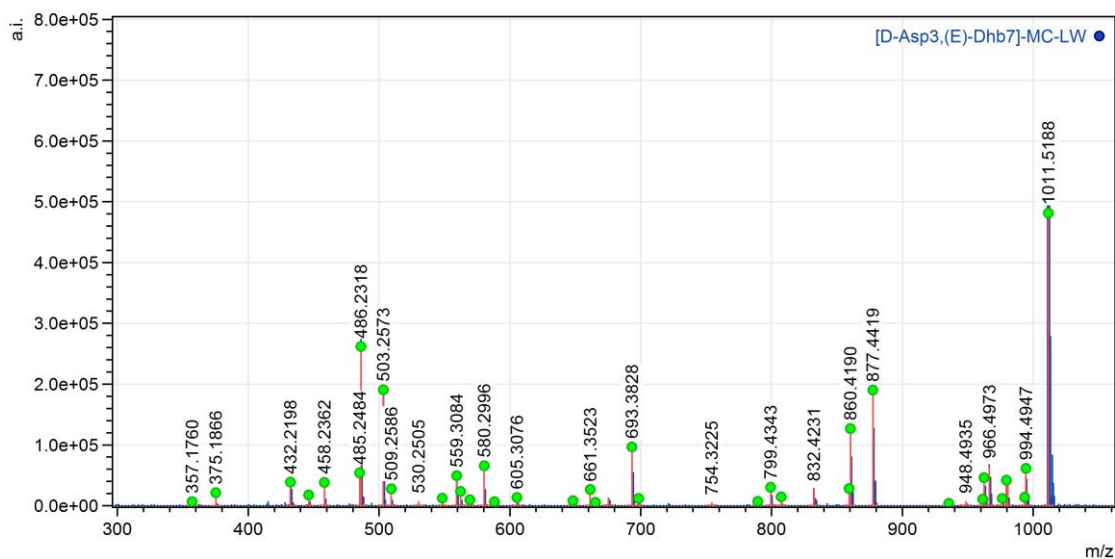

| Length     | Mo. Mass  | Av. Mass      | Coverage       | Matched Int.  |                            |            |
|------------|-----------|---------------|----------------|---------------|----------------------------|------------|
| 7 (Cyclic) | 1010.5113 | 1011.1717     | 100.0 %        | 90.4 %        |                            |            |
| Meas. m/z  | Calc. m/z | $\delta$ (Da) | $\delta$ (ppm) | Rel. Int. (%) | Annotation                 | Formula    |
| 357.1760   | 357.1809  | -0.0048       | -13.5          | 1.35          | z3 -C9H10O -H2O [7 1][5-7] | C20H24N2O4 |
| 375.1866   | 375.1914  | -0.0049       | -13.0          | 4.42          | z3 -C9H10O [7 1][5-7]      | C20H26N2O5 |
| 432.2198   | 432.2241  | -0.0044       | -10.1          | 8.02          | c3 [1 2][1-3]              | C21H29N5O5 |
| 446.2263   | 446.2286  | -0.0022       | -5.0           | 3.63          | z4 -C9H10O [1 2][4-7]      | C23H31N3O6 |
| 458.2362   | 458.2398  | -0.0036       | -7.8           | 7.94          | a4 [7 1][1-4]              | C23H31N5O5 |
| 486.2318   | 486.2347  | -0.0029       | -5.9           | 54.38         | b4 [7 1][1-4]              | C24H31N5O6 |
| 503.2573   | 503.2613  | -0.0040       | -7.9           | 39.55         | c4 [7 1][1-4]              | C24H34N6O6 |

|           |           |         |       |        |                                |             |
|-----------|-----------|---------|-------|--------|--------------------------------|-------------|
| 509.2586  | 509.2646  | -0.0060 | -11.7 | 5.64   | z3 [7 1][5-7]                  | C29H36N2O6  |
| 509.2586  | 509.2646  | -0.0060 | -11.7 | 5.64   | b3 -NH3 [4 5][1-3]             | C29H36N2O6  |
| 548.2727  | 548.2755  | -0.0029 | -5.2  | 2.52   | z4 -CH3OH [1 2][4-7]           | C31H37N3O6  |
| 548.2727  | 548.2755  | -0.0029 | -5.2  | 2.52   | b4 -CH3OH -NH3 [4 5][1-4]      | C31H37N3O6  |
| 559.3084  | 559.3126  | -0.0043 | -7.6  | 10.17  | b5 -C9H10O -NH3 [4 5][1-5]     | C29H42N4O7  |
| 559.3084  | 559.3126  | -0.0043 | -7.6  | 10.17  | z5 -C9H10O [2 3][3-7]          | C29H42N4O7  |
| 562.2890  | 562.2912  | -0.0022 | -3.9  | 4.76   | b4 -H2O -NH3 [4 5][1-4]        | C32H39N3O6  |
| 562.2890  | 562.2912  | -0.0022 | -3.9  | 4.76   | z4 -H2O [1 2][4-7]             | C32H39N3O6  |
| 569.2633  | 569.2718  | -0.0085 | -15.0 | 1.96   | b5 [6 7][1-5]                  | C28H36N6O7  |
| 580.2996  | 580.3017  | -0.0022 | -3.7  | 13.54  | b4 -NH3 [4 5][1-4]             | C32H41N3O7  |
| 580.2996  | 580.3017  | -0.0022 | -3.7  | 13.54  | z4 [1 2][4-7]                  | C32H41N3O7  |
| 588.2876  | 588.2817  | 0.0059  | 10.0  | 1.29   | b4 +CO -C9H10O -H2O [3 4][1-4] | C32H37N5O6  |
| 605.3076  | 605.3082  | -0.0006 | -0.9  | 2.71   | c4 +CO -C9H10O -H2O [3 4][1-4] | C32H40N6O6  |
| 648.3367  | 648.3392  | -0.0025 | -3.9  | 1.60   | b5 -C9H10O -NH3 [7 1][1-5]     | C35H45N5O7  |
| 648.3367  | 648.3392  | -0.0025 | -3.9  | 1.60   | z5 -C9H10O [5 6][3-7]          | C35H45N5O7  |
| 661.3523  | 661.3596  | -0.0073 | -11.0 | 5.42   | b5 -CH3OH -NH3 [4 5][1-5]      | C37H48N4O7  |
| 661.3523  | 661.3596  | -0.0073 | -11.0 | 5.42   | z5 -CH3OH [2 3][3-7]           | C37H48N4O7  |
| 665.3734  | 665.3697  | 0.0037  | 5.6   | 1.03   | a4 -H2O -NH3 [1 2][1-4]        | C40H48N4O5  |
| 665.3734  | 665.3657  | 0.0077  | 11.6  | 1.03   | b5 -C9H10O [7 1][1-5]          | C35H48N6O7  |
| 693.3828  | 693.3858  | -0.0030 | -4.3  | 20.07  | z5 [2 3][3-7]                  | C38H52N4O8  |
| 693.3828  | 693.3858  | -0.0030 | -4.3  | 20.07  | b5 -NH3 [4 5][1-5]             | C38H52N4O8  |
| 698.3109  | 698.3144  | -0.0035 | -5.1  | 2.34   | b6 [5 6][1-6]                  | C33H43N7O10 |
| 789.4081  | 789.4056  | 0.0025  | 3.2   | 1.36   | b6 +CO -C9H11O [3 4][1-6]      | C41H54N7O9  |
| 799.4343  | 799.4389  | -0.0046 | -5.8  | 6.15   | b5 [7 1][1-5]                  | C44H58N6O8  |
| 807.4200  | 807.4287  | -0.0087 | -10.8 | 2.86   | b6 -H2O [4 5][1-6]             | C42H58N6O10 |
| 859.4343  | 859.4349  | -0.0006 | -0.7  | 5.71   | M -C9H10O -H2O [7 1][1-7]      | C44H58N8O10 |
| 860.4190  | 860.4189  | 0.0001  | 0.1   | 26.26  | M -C9H10O -NH3 [7 1][1-7]      | C44H57N7O11 |
| 877.4419  | 877.4495  | -0.0076 | -8.7  | 39.41  | a6 -H2O -NH3 [1 2][1-6]        | C49H60N6O9  |
| 877.4419  | 877.4454  | -0.0036 | -4.1  | 39.41  | M -C9H10O [7 1][1-7]           | C44H60N8O11 |
| 935.4651  | 935.4662  | -0.0010 | -1.1  | 0.71   | c6 +CO -CH3OH -H2O [1 2][1-6]  | C50H62N8O10 |
| 961.4832  | 961.4818  | 0.0014  | 1.4   | 2.09   | M -CH3OH -H2O [7 1][1-7]       | C52H64N8O10 |
| 962.4716  | 962.4658  | 0.0058  | 6.0   | 9.51   | M -CH3OH -NH3 [7 1][1-7]       | C52H63N7O11 |
| 976.4822  | 976.4815  | 0.0007  | 0.7   | 2.34   | M -H2O -NH3 [7 1][1-7]         | C53H65N7O11 |
| 979.4930  | 979.4924  | 0.0006  | 0.6   | 8.60   | M -CH3OH [7 1][1-7]            | C52H66N8O11 |
| 993.5082  | 993.5080  | 0.0002  | 0.2   | 2.82   | M -H2O [7 1][1-7]              | C53H68N8O11 |
| 994.4947  | 994.4920  | 0.0026  | 2.6   | 12.67  | M -NH3 [7 1][1-7]              | C53H67N7O12 |
| 1011.5188 | 1011.5186 | 0.0002  | 0.2   | 100.00 | M [7 1][1-7]                   | C53H70N8O12 |

## Q-TOF tandem MS

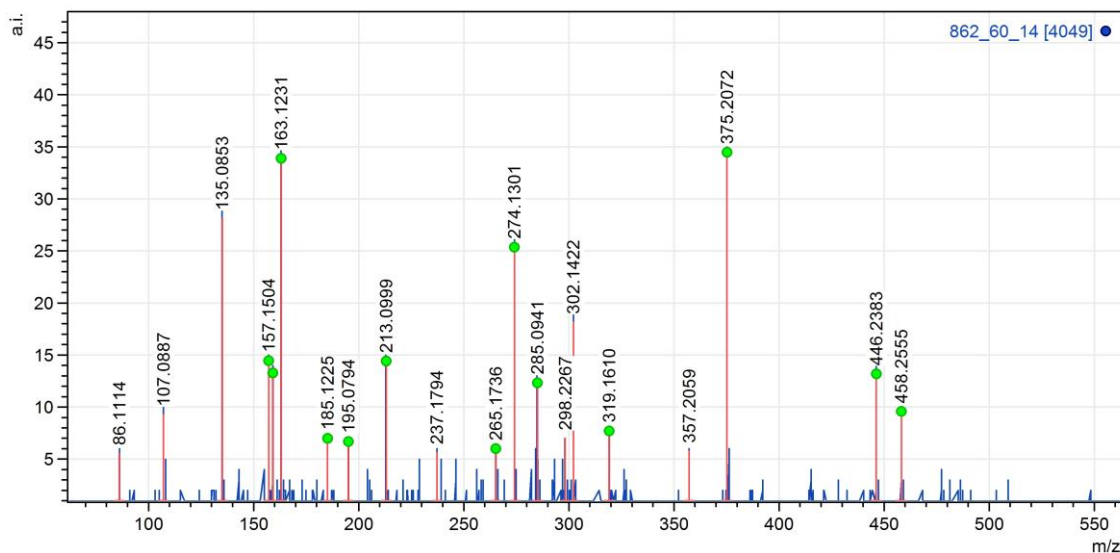

| Meas. m/z | Calc. m/z | $\delta$ (Da) | $\delta$ (ppm) | Rel. Int. (%) | Annotation                                                        | Formula                                                       |
|-----------|-----------|---------------|----------------|---------------|-------------------------------------------------------------------|---------------------------------------------------------------|
| 157.1504  | 157.1335  | 0.0169        | 107.4          | 40.23         | a2 [7 1][1-2]                                                     | C <sub>8</sub> H <sub>16</sub> N <sub>2</sub> O               |
| 159.0997  | 159.1128  | -0.0131       | -82.2          | 36.68         | c1 +CO [1 2][1-1]                                                 | C <sub>7</sub> H <sub>14</sub> N <sub>2</sub> O <sub>2</sub>  |
| 163.1231  | 163.1117  | 0.0114        | 69.8           | 98.33         | z1 -C <sub>9</sub> H <sub>10</sub> O [5 6][7-7]                   | C <sub>11</sub> H <sub>14</sub> O                             |
| 185.1225  | 185.1285  | -0.0059       | -32.0          | 17.92         | b2 [7 1][1-2]                                                     | C <sub>9</sub> H <sub>16</sub> N <sub>2</sub> O <sub>2</sub>  |
| 195.0794  | 195.0764  | 0.0030        | 15.5           | 17.03         | b2 -H <sub>2</sub> O [5 6][1-2]                                   | C <sub>9</sub> H <sub>10</sub> N <sub>2</sub> O <sub>3</sub>  |
| 213.0999  | 213.0870  | 0.0129        | 60.6           | 40.08         | b2 [5 6][1-2]                                                     | C <sub>9</sub> H <sub>12</sub> N <sub>2</sub> O <sub>4</sub>  |
| 265.1736  | 265.1587  | 0.0149        | 56.2           | 14.94         | z1 -CH <sub>3</sub> OH [5 6][7-7]                                 | C <sub>19</sub> H <sub>20</sub> O                             |
| 274.1301  | 274.1438  | -0.0137       | -49.9          | 72.83         | z2 -C <sub>9</sub> H <sub>10</sub> O -H <sub>2</sub> O [6 7][6-7] | C <sub>16</sub> H <sub>19</sub> N <sub>3</sub> O              |
| 274.1301  | 274.1186  | 0.0115        | 41.9           | 72.83         | a2 [2 3][1-2]                                                     | C <sub>14</sub> H <sub>15</sub> N <sub>3</sub> O <sub>3</sub> |
| 285.0941  | 285.0870  | 0.0072        | 25.1           | 33.86         | b2 -NH <sub>3</sub> [2 3][1-2]                                    | C <sub>15</sub> H <sub>12</sub> N <sub>2</sub> O <sub>4</sub> |
| 319.1610  | 319.1765  | -0.0155       | -48.5          | 20.04         | a4 -H <sub>2</sub> O -H <sub>2</sub> O [6 7][1-4]                 | C <sub>16</sub> H <sub>22</sub> N <sub>4</sub> O <sub>3</sub> |
| 375.2072  | 375.1914  | 0.0157        | 42.0           | 100.00        | z3 -C <sub>9</sub> H <sub>10</sub> O [7 1][5-7]                   | C <sub>20</sub> H <sub>26</sub> N <sub>2</sub> O <sub>5</sub> |
| 446.2383  | 446.2286  | 0.0097        | 21.8           | 36.45         | b4 -C <sub>9</sub> H <sub>10</sub> O -NH <sub>3</sub> [4 5][1-4]  | C <sub>23</sub> H <sub>31</sub> N <sub>3</sub> O <sub>6</sub> |
| 458.2555  | 458.2398  | 0.0157        | 34.2           | 25.62         | a4 [7 1][1-4]                                                     | C <sub>23</sub> H <sub>31</sub> N <sub>5</sub> O <sub>5</sub> |



# <sup>1</sup>H-NMR spectrum of compound 3

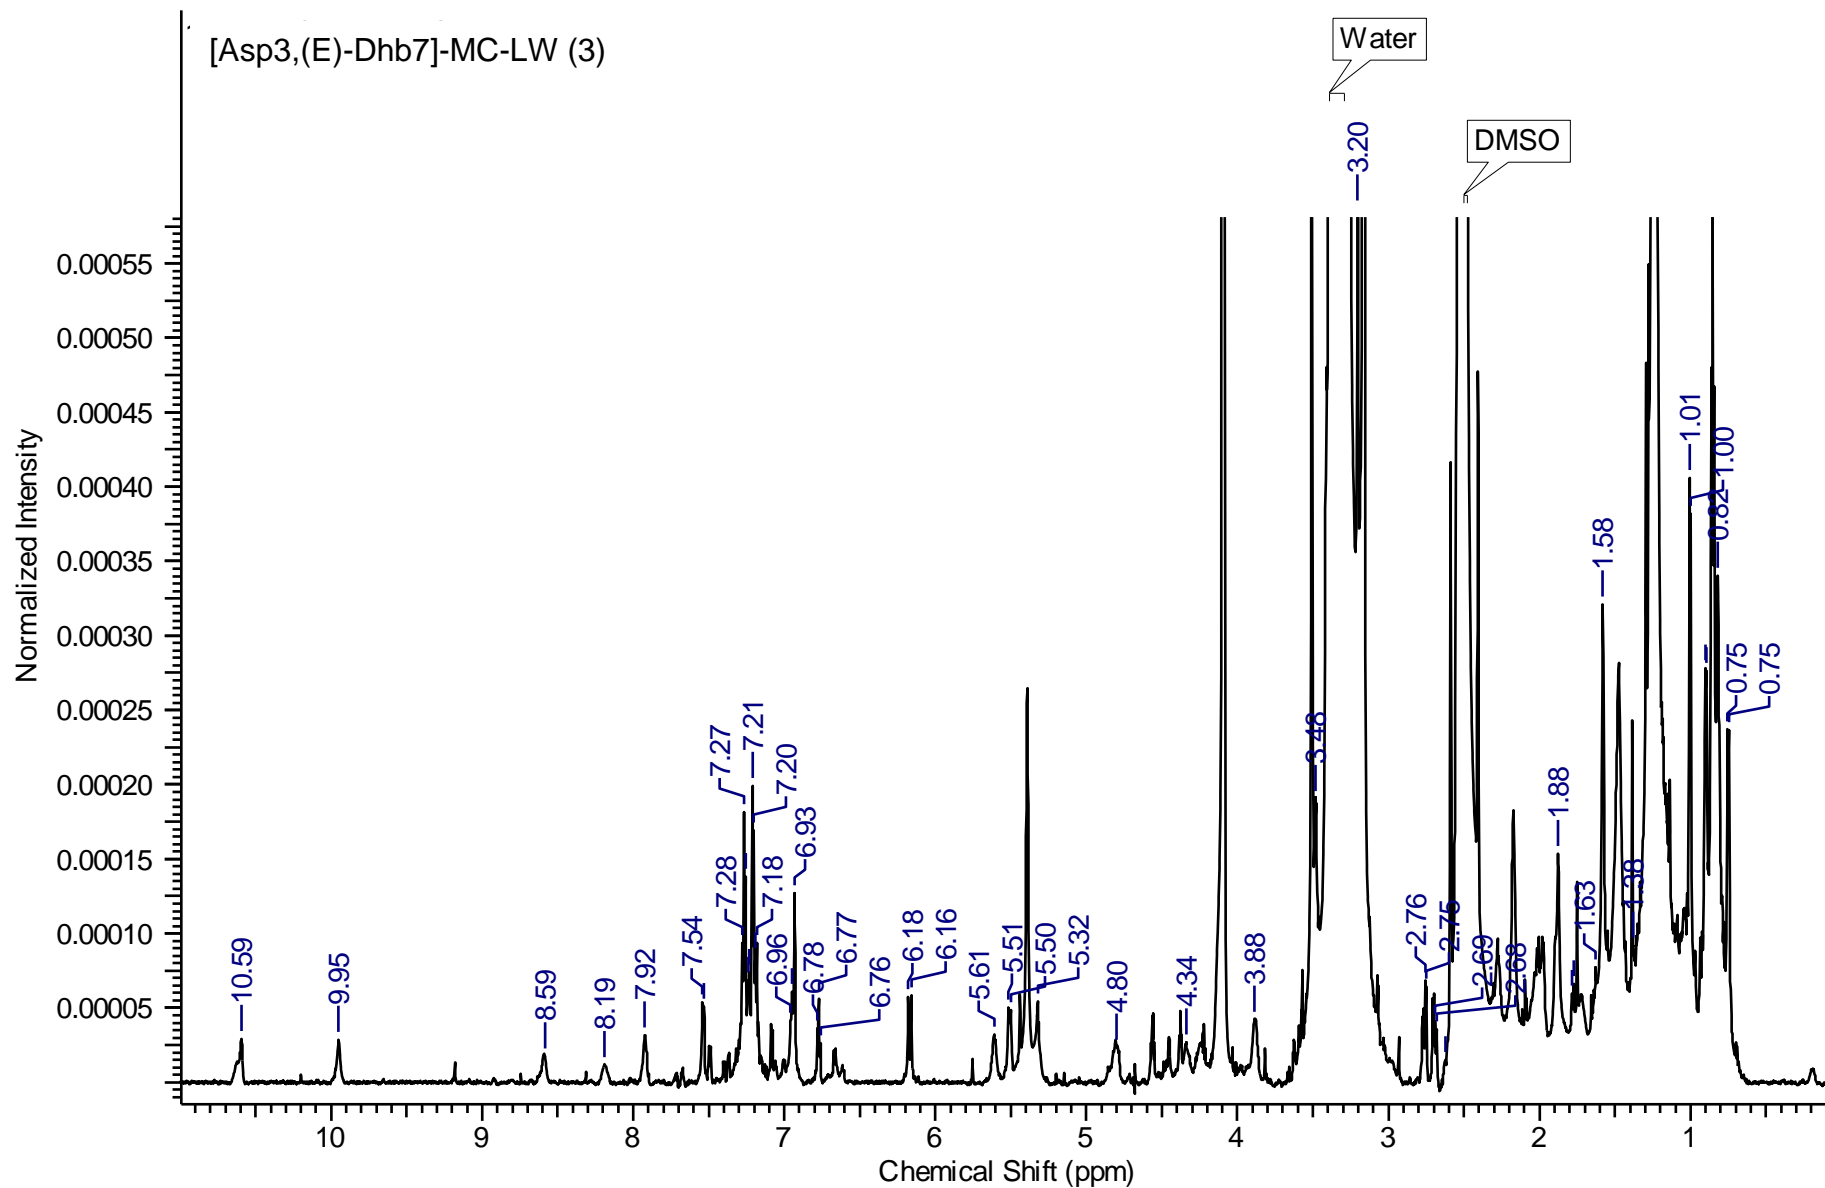

# Python Script for MC congener calculation and its output

## Script

```
import itertools

monomers = [
#Position 1: only Ala known in MCs from Planktothrix or Oscillatoria
    [71.0371],
#Position 2: make all known monomers in this flexible position possible; do not apply
restrictions indicated by biosynthesis genes
    [113.0841, 71.0371, 163.0633, 129.0426, 99.0684, 143.0582, 156.1011, 147.0684,
147.0354, 161.0841, 177.0790, 186.0793, 170.1168, 127.0997, 167.0946],
#Position 3: unmethylated Asp highly likely
    [115.0269],
#Position 4: make all known monomers in this flexible position possible; do not apply
restrictions indicated by biosynthesis genes
    [71.0371, 85.0528, 113.0841, 156.1011, 129.0426, 143.0582, 147.0684, 163.0633,
186.0793, 147.0354, 170.1168, 177.0790, 161.0841, 85.0528],
#Position 5: only Adda known in MCs from Planktothrix or Oscillatoria
    [313.2042],
#Position 6: Glu highly likely
    [129.0426],
#Position 7: strain can only synthesize Dhb
    [83.0371],
]

monomers = [item for item in monomers if item != []]

combinations = list(itertools.product(*monomers))

sums = [sum(item) for item in combinations]

both = sorted(zip(combinations, sums), key=lambda both: both[1])

f = open('output.csv', 'wb')
f.write('Molecular Mass' + ';' + ';' + '.join('Monomer ' + str(i+1) for i in
range(len(monomers))) + '\r\n')

for item in both:
    f.write(str(item[1]) + ';' + ';' + '.join([str(x) for x in item[0]]) + '\r\n')

f.close()
```

## Output

Manually filtered for observed molecular weights around 987.497, 1010.509, and 1074.505  
Indicated in bold: final established structure after evaluation of NMR and tandem MS data

| Molecular Mass   | Monomer 1      | Monomer 2       | Monomer 3       | Monomer 4       | Monomer 5       | Monomer 6       | Monomer 7      |
|------------------|----------------|-----------------|-----------------|-----------------|-----------------|-----------------|----------------|
| <b>987.4953</b>  | <b>71.0371</b> | <b>113.0841</b> | <b>115.0269</b> | <b>163.0633</b> | <b>313.2042</b> | <b>129.0426</b> | <b>83.0371</b> |
| 987.4953         | 71.0371        | 163.0633        | 115.0269        | 113.0841        | 313.2042        | 129.0426        | 83.0371        |
| 987.4953         | 71.0371        | 99.0684         | 115.0269        | 177.079         | 313.2042        | 129.0426        | 83.0371        |
| 1010.5072        | 71.0371        | 143.0582        | 115.0269        | 156.1011        | 313.2042        | 129.0426        | 83.0371        |
| 1010.5072        | 71.0371        | 156.1011        | 115.0269        | 143.0582        | 313.2042        | 129.0426        | 83.0371        |
| 1010.5073        | 71.0371        | 129.0426        | 115.0269        | 170.1168        | 313.2042        | 129.0426        | 83.0371        |
| 1010.5073        | 71.0371        | 170.1168        | 115.0269        | 129.0426        | 313.2042        | 129.0426        | 83.0371        |
| <b>1010.5113</b> | <b>71.0371</b> | <b>113.0841</b> | <b>115.0269</b> | <b>186.0793</b> | <b>313.2042</b> | <b>129.0426</b> | <b>83.0371</b> |
| 1010.5113        | 71.0371        | 186.0793        | 115.0269        | 113.0841        | 313.2042        | 129.0426        | 83.0371        |
| <b>1074.5062</b> | <b>71.0371</b> | <b>177.079</b>  | <b>115.0269</b> | <b>186.0793</b> | <b>313.2042</b> | <b>129.0426</b> | <b>83.0371</b> |
| 1074.5062        | 71.0371        | 186.0793        | 115.0269        | 177.079         | 313.2042        | 129.0426        | 83.0371        |

# EC<sub>50</sub> calculation

The script used for the calculation of EC<sub>50</sub> values can be found below, followed by the graphical output of the script.

Currently, a Graphical User Interface (GUI) for the tool EC<sub>50</sub><sup>calculator</sup> is under development. This, as well as the validation of the tool performance, will be reported separately.

## Script

```
# -*- coding: utf-8 -*-

"""
This script is the backbone of the software EC50calculator. A GUI for this
tool is currently under development.

This script is licensed CC-BY.
You are free:
    to Share: to copy, distribute and transmit the work
    to Remix: to adapt the work
    to make commercial use of the work
Under the following conditions:
    Attribution: You must attribute the work in the manner specified by the
    author or licensor (but not in any way that suggests that they endorse
    you or your use of the work).
For more information see http://creativecommons.org/licenses/by/2.0/
"""

from itertools import cycle
import numpy as np
import matplotlib.pyplot as plt
from scipy.optimize import curve_fit

# Settings.
BLACK_AND_WHITE = False
DRAW_ERROR_BARS = True
X_UNIT = 'nM'

def four_parameter_logistic_model(x, ec50, slope, top, bottom):
    """Calculate estimates using 4PL equation."""
    return bottom + ((top - bottom) / (1 + (x/ec50)**slope))

# Compounds data.
compounds = []

# Input of experimental X and Y data as well as Y-error.
compounds.append({
    'name': 'MC-LR',
    'xdata': np.array([0.03943662, 0.078873239, 0.394366197, 0.788732394,
                      3.943661972, 7.887323944, 39.43661972, 78.87323944,
                      394.3661972, 788.7323944]),
    'ydata': np.array([89.84341938, 91.67904903, 83.11468472, 83.58107501,
                      15.61802767, 14.17689378, 6.389301634, 5.924672027,
                      0.29717682, 0.891530461]),
    'sd': np.array([3.746359606, 0.251566602, 3.560375452, 3.640321726,
                   0.554277319, 1.159312281, 0.424481267, 1.59888909,
                   0.440853711, 1.29560105])
})
```

```

compounds.append({
    'name': 'MC-HtyY',
    'xdata': np.array([0.023453853, 0.046907707, 0.234538535, 0.469077069,
                      2.345385347, 4.690770695, 23.45385347, 46.90770695,
                      234.5385347, 469.0770695]),
    'ydata': np.array([93.22560597, 98.63269111, 81.64556962, 92.66244168,
                      59.30535123, 33.37476694, 13.98384089, 12.65822785,
                      5.497771174, 5.221518987]),
    'sd': np.array([1.156027235, 1.701948577, 4.42834711, 4.29218852,
                   4.302243708, 4.005304042, 1.674676021, 1.180642196,
                   0.938254754, 1.073210344])
})

compounds.append({
    'name': 'MC-HtyHty',
    'xdata': np.array([0.008591549, 0.017183099, 0.085915493, 0.171830986,
                      0.85915493, 1.718309859, 8.591549296, 17.18309859,
                      85.91549296, 171.8309859]),
    'ydata': np.array([104.0365985, 109.6878364, 107.7502691, 103.0678149,
                      87.56727664, 80.13662638, 25.90646348, 17.10769231,
                      10.38751346, 6.516027325]),
    'sd': np.array([7.124556368, 4.489801528, 6.301014592, 7.723351793,
                   5.62632281, 4.926057796, 2.142121388, 0.989825707,
                   1.424439145, 2.785592448])
})

compounds.append({
    'name': 'MC-LY (1)',
    'xdata': np.array([0.014463019, 0.028926039, 0.144630193, 0.289260385,
                      1.446301925, 2.89260385, 14.46301925, 28.9260385,
                      144.6301925, 289.260385]),
    'ydata': np.array([95.53770638, 90.98101266, 95.25316456, 94.77848101,
                      68.98734177, 56.80379747, 22.57920571, 17.7599286,
                      6.962025316, 4.574811625]),
    'sd': np.array([8.118161627, 7.962248067, 10.8621385, 6.703991743,
                   19.08080434, 8.838711702, 3.927820396, 1.26252992,
                   2.004821903, 0.834538341])
})

compounds.append({
    'name': 'MC-HtyW (2)',
    'xdata': np.array([0.010335196, 0.020670391, 0.103351955, 0.206703911,
                      1.033519553, 2.067039106, 10.33519553, 20.67039106,
                      103.3519553, 206.7039106]),
    'ydata': np.array([95.2765693, 98.07333748, 97.32753263, 100.8073197,
                      84.83530143, 77.56370416, 32.8154133, 23.62755651,
                      10.06836544, 9.322560597]),
    'sd': np.array([8.889146668, 9.404856199, 9.660657541, 3.165519847,
                   8.747664581, 11.39295451, 5.176340653, 1.416905335,
                   1.251707784, 0.326178133])
})

compounds.append({
    'name': 'MC-LW (3)',
    'xdata': np.array([0.002376238, 0.004752475, 0.023762376, 0.047524752,
                      0.237623762, 0.475247525, 2.376237624, 4.752475248,
                      23.76237624, 47.52475248]),
    'ydata': np.array([90.18987342, 91.36109385, 96.95463021, 95.88607595,
                      89.24050633, 90.49034175, 74.84177215, 56.86761964,
                      22.00124301, 17.24683544]),
    'sd': np.array([2.446214043, 2.645124482, 1.378518003, 3.663303034,
                   3.317751097, 4.351216653, 3.418672395, 5.251377734,
                   1.552341365, 1.698100488])
})

```

```

for compound in compounds:

    # Fit curve.
    popt, pcov, infodict, errmsg, ier = curve_fit(
        four_parameter_logistic_model,
        compound['xdata'],
        compound['ydata'],
        full_output=True)

    # Calculate additional parameters and write all
    # calculated parameters in compound dictionary.
    compound['ec50'] = popt[0]
    compound['slope'] = popt[1]
    compound['top'] = popt[2]
    compound['bottom'] = popt[3]
    compound['sd_ec50'] = pcov[0, 0]**0.5
    compound['sd_slope'] = pcov[1, 1]**0.5
    compound['percent_fitting_error'] = (pcov[0, 0]**0.5) / popt[0] * 100

    # Calculate R squared.
    sum_of_squares = (infodict['fvec']**2).sum()
    ss_tot = ((compound['ydata']-compound['ydata'].mean())**2).sum()
    rsquared = 1-(sum_of_squares/ss_tot)

    compound['sum_of_squares'] = sum_of_squares
    compound['rsquared'] = rsquared

    # Calculate points of fitted curve and put them in the
    # compound dictionary.
    x = np.linspace(
        (compound['xdata'].min() - 0.5 * compound['xdata'].min()),
        (compound['xdata'].max() + 0.5 * compound['xdata'].max()),
        ((compound['xdata'].max() - compound['xdata'].min()) * 50)
    )
    y = four_parameter_logistic_model(x, *popt)
    compound['x'] = x
    compound['y'] = y

    print 60*'- '
    print compound['name']
    print 'EC50: %s' % compound['ec50']
    print 'Slope: %s' % compound['slope']
    print 'Top asymptote: %s' % compound['top']
    print 'Bottom asymptote: %s' % compound['bottom']
    print 'SD EC50: %s' % compound['sd_ec50']
    print 'SD Slope %s' % compound['sd_slope']
    print '% Fitting Error: %s' % compound['percent_fitting_error']
    print 'Sum of squares: %s' % compound['sum_of_squares']
    print 'R squared: %s' % compound['rsquared']

# Create and show plot for all compounds.

# Define markers and colors for different plot styles:
# "color" or "black & white"
markers = cycle(['s', '^', 'v', 'd', 'o', '*'])
colors = cycle(['b', 'g', 'r', 'c', 'm', 'k'])
lines = cycle(['-', '--', '-.', ':', '.'])

```

```

# Calculate x- and y-axis parameters that fit to
# plot all curves in one graph.
xmax = np.max([compound['xdata'] for compound in compounds])
xmin = np.min([compound['xdata'] for compound in compounds])
if compound['sd'] is not None:
    ymax = np.max([(compound['ydata'] + compound['sd']) for
                    compound in compounds])
    ymin = np.min([(compound['ydata'] - compound['sd']) for
                    compound in compounds])
else:
    ymax = np.max([compound['ydata'] for compound in compounds])
    ymin = np.min([compound['ydata'] for compound in compounds])

for compound in compounds:

    # Define marker/line style/color depending on choice
    # "color" or "black & white"
    if BLACK_AND_WHITE:
        marker = markers.next()
        color = 'k'
        linestyle = lines.next()
    else:
        marker = 'o'
        color = colors.next()
        linestyle = '-'

    plt.semilogx(compound['xdata'],
                  compound['ydata'],
                  linestyle='None',
                  marker=marker,
                  color=color,
                  markeredgecolor='none',
                  label=compound['name'])
    plt.semilogx(compound['x'],
                  compound['y'],
                  linestyle=linestyle,
                  label='fit %s' % compound['name'],
                  color=color)
    if compound['sd'] is not None and DRAW_ERROR_BARS is True:
        plt.errorbar(compound['xdata'],
                     compound['ydata'],
                     yerr=compound['sd'],
                     ecolor='k',
                     fmt=None)

# Adjust x- and y-axes according to data.
plt.ylim(np.floor(ymin/10)*10, np.ceil(ymax/10)*10)
plt.xlim(xmin*0.2, xmax*8)

# Adjust ticks according to y-axis range.
plt.yticks(range(int(np.floor(ymin/10)*10),
                 int(np.ceil(ymax/10)*10+10), 10))

# Decorate graph.
plt.title('Dose-Response-Curves')
plt.xlabel('Concentration [%s]' % X_UNIT)
plt.ylabel('Activity [%]')
plt.legend(loc='upper right', numpoints=1, prop={'size': 10})
plt.grid(True)

plt.show()

```

# Output

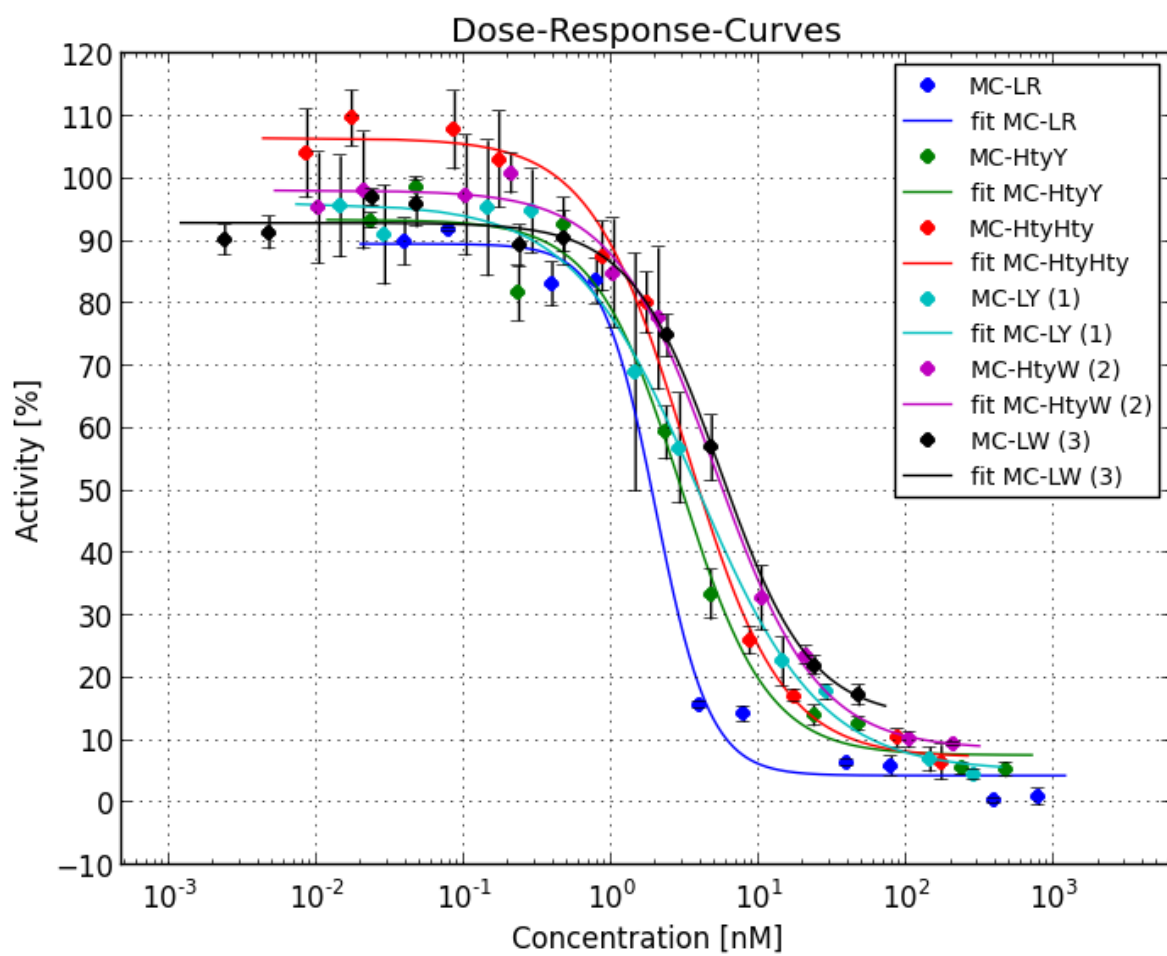



## Typical UV spectra of microcystins

### Microcystin containing no aromatic amino acid (e.g. MC-LR)

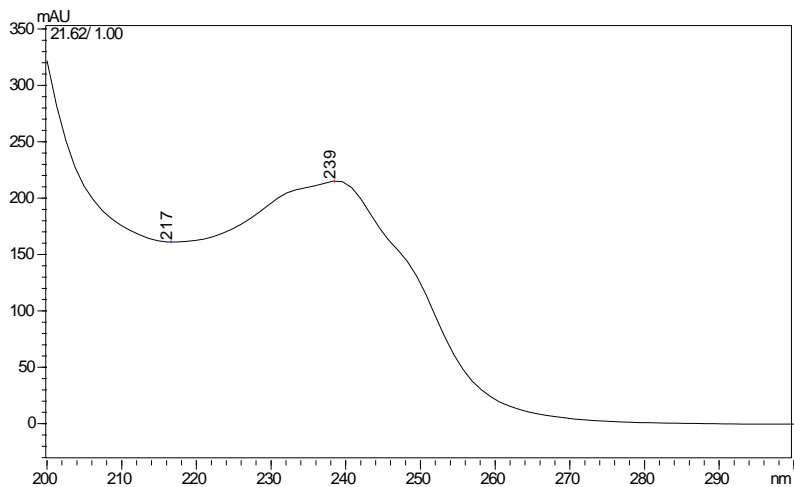

### Microcystins containing aromatic amino acids such as Tyr or Hty (e.g. compound 1)

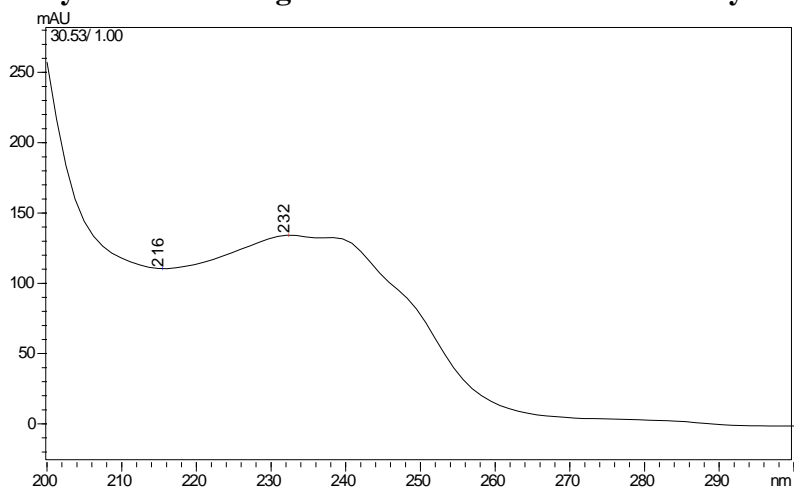

### Microcystins containing Trp (e.g. compound 2)

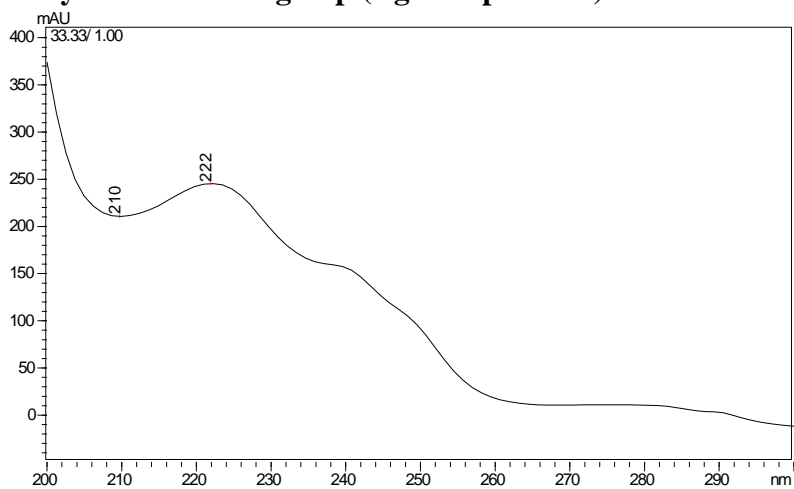

Supplement: 13659_2013_1_MOESM1_ESM.pdf [file 13659_2013_1_MOESM1_ESM.pdf]
